# Supplementary material for: Tunable Dimroth rearrangement of versatile 1,2,3-triazoles towards high-performance energetic materials
Source: Royal Society of Chemistry journal article supplement (doi:10.1039/d1ta00109d), 2021-01-01
Supplement: d1ta00109d1.pdf [file d1ta00109d1.pdf]

# Tunable Dimroth rearrangement of versatile 1,2,3-triazoles towards high-performance energetic materials

Shangbiao Feng,<sup>abc</sup> Ping Yin,<sup>\*abc</sup> Chunlin He,<sup>abc</sup> Siping Pang,<sup>\*a</sup> and Jean'ne M. Shreeve<sup>\*b</sup>

<sup>a</sup> School of Materials Science & Engineering, Beijing Institute of Technology, Beijing 100081, China

<sup>b</sup> Department of Chemistry, University of Idaho, Moscow, ID 83844-2343 United States

<sup>c</sup> Beijing Institute of Technology Chongqing Innovation Center, Chongqing, 401120, China

## Electronic Supplementary Information

### Table of Contents

|                                                                   |     |
|-------------------------------------------------------------------|-----|
| 1. FT Calculations of Mechanism of Dimroth Rearrangement.         | S2  |
| 2. X-ray Crystallography                                          | S10 |
| 3. <sup>1</sup> H and <sup>13</sup> C NMR Spectra of All Products | S13 |

## 1. DFT Calculations of Mechanism of Dimroth Rearrangement

All the DFT calculations of Mechanism were performed with Gaussian 09 package.<sup>1</sup> The geometry optimization of Dimroth rearrangement in this study were performed using M062X/6-31G(d,p). Frequency calculations at the same level of theory were also performed to identify all the stationary points as minima (zero imaginary frequencies) or transition states (one imaginary frequency) and to obtain the thermodynamic corrections to Gibbs free energy at 298.15 K. Intrinsic reaction coordinate (IRC) was carried out to confirm the connection between the transition state and the right reactant/product. The single-point energy calculations of key intermediates and transition states were performed with M062X/6-311++G(d,p) level. The reported Gibbs free energy of all species in this study was calculated in the gas-phase of 298.15 K, 1atm.

### 1.1 The geometry structures of key intermediates and transition states.

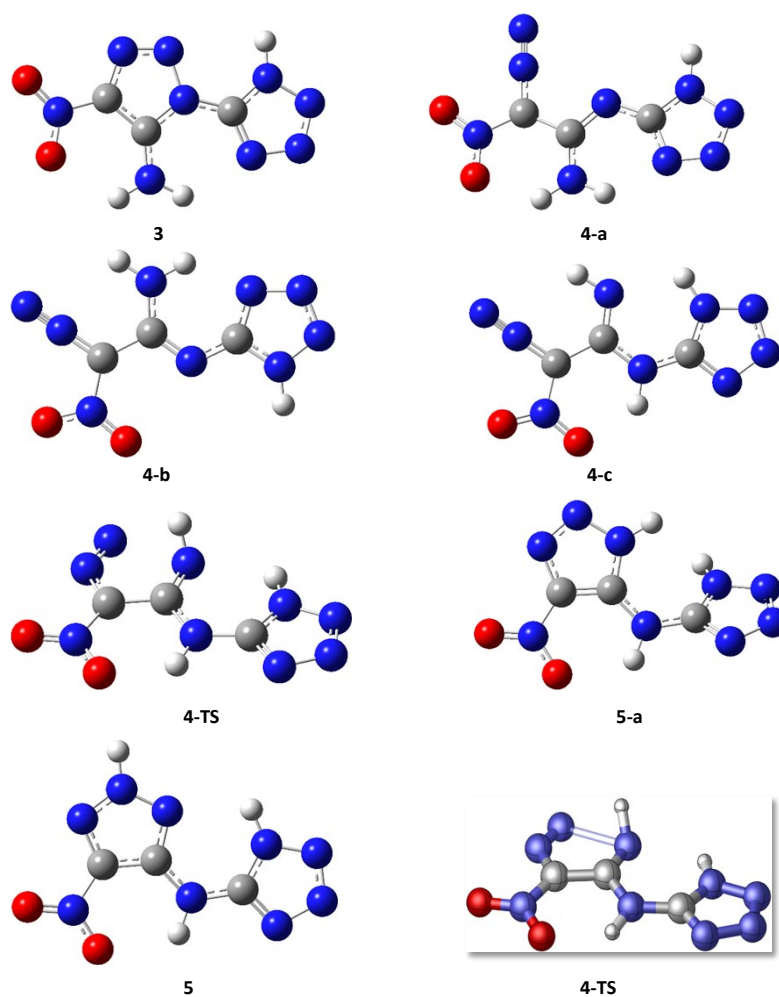

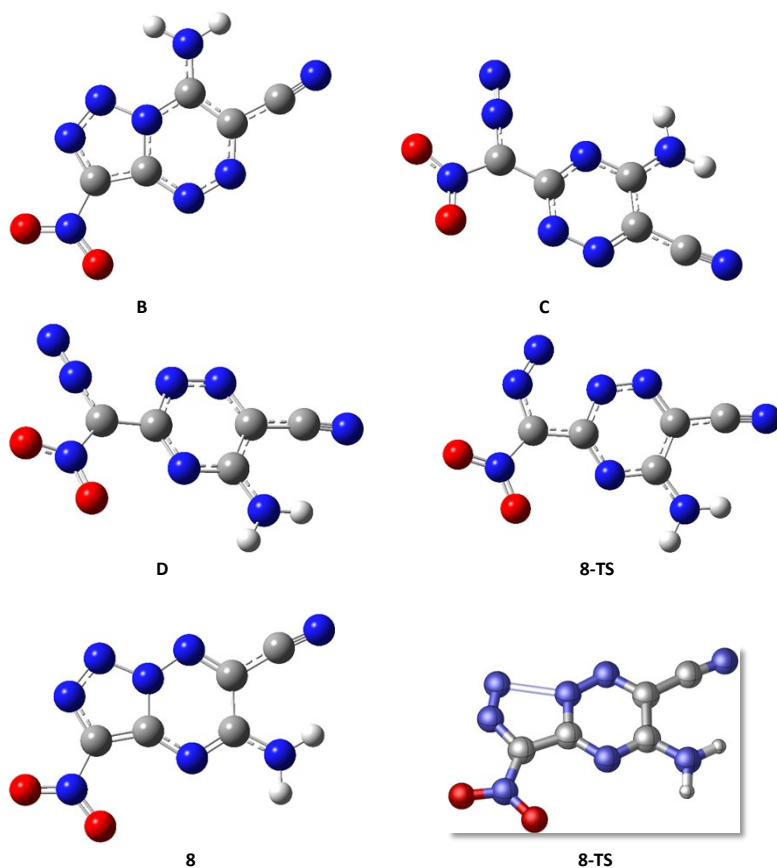

**Table 1.** The calculated Gibbs free energy of all species in this study.

| Species     | E(M062x/6-311++g**)(a.u.) | TCG(a.u.) | G(a.u.)      | del-G(kcal/mol) |
|-------------|---------------------------|-----------|--------------|-----------------|
| <b>3</b>    | -759.071641               | 0.071121  | -759.00052   | 0               |
| <b>4-a</b>  | -759.0654581              | 0.068049  | -758.9974091 | 2.0             |
| <b>4-b</b>  | -759.0467914              | 0.067688  | -758.9791034 | 13.4            |
| <b>4-c</b>  | -759.0446338              | 0.066855  | -758.9777788 | 14.3            |
| <b>4-TS</b> | -758.9990084              | 0.067017  | -758.9319914 | 41.0            |
| <b>5-a</b>  | -759.0565911              | 0.070083  | -758.9865081 | 8.8             |
| <b>5</b>    | -759.0761675              | 0.072554  | -759.0036135 | -1.9            |
| <b>B</b>    | -779.898656               | 0.062686  | -779.83597   | 0               |
| <b>C</b>    | -779.9028067              | 0.057339  | -779.8454677 | -6.0            |
| <b>D</b>    | -779.9073867              | 0.057921  | -779.8494657 | -8.5            |
| <b>8-TS</b> | -779.8819959              | 0.059921  | -779.8220749 | 8.7             |
| <b>8</b>    | -779.9127022              | 0.062676  | -779.8500262 | -8.8            |

Cartesian coordinates of all the species:

**3**

|   |             |             |             |
|---|-------------|-------------|-------------|
| O | 3.92185400  | -0.75622900 | 0.00043200  |
| O | 3.22474300  | 1.30174200  | 0.00087500  |
| N | -2.33891100 | 1.10829200  | -0.00068900 |

|   |             |             |             |
|---|-------------|-------------|-------------|
| N | -3.67653500 | 0.87763000  | 0.00017500  |
| N | -3.93394800 | -0.37279100 | 0.00103600  |
| N | -0.44139500 | -0.35347900 | -0.00077500 |
| N | 0.01126400  | -1.66788900 | -0.00070700 |
| N | 1.28063200  | -1.62214700 | -0.00044200 |
| N | 3.04873700  | 0.08146200  | 0.00036300  |
| N | 0.46560000  | 1.85566800  | -0.00046100 |
| H | -0.45536400 | 2.27562100  | -0.00067900 |
| H | 1.32009300  | 2.39359900  | 0.00049700  |
| C | -1.79059700 | -0.08034700 | -0.00028200 |
| C | 1.69017300  | -0.32992500 | -0.00035700 |
| C | 0.59296700  | 0.53202400  | -0.00041500 |
| N | -2.74774000 | -1.01287600 | 0.00073000  |
| H | -2.66669800 | -2.02090800 | 0.00144900  |

**4-a**

|   |             |             |             |
|---|-------------|-------------|-------------|
| O | 3.91680100  | 0.14022400  | -0.00029300 |
| O | 2.85197500  | -1.75054700 | -0.00007200 |
| N | -2.50782000 | -1.01060900 | -0.00004700 |
| N | -3.84268500 | -0.80783700 | -0.00018600 |
| N | -4.12165800 | 0.44124300  | 0.00002000  |
| N | -0.63254100 | 0.57074700  | -0.00008000 |
| N | 1.90909200  | 2.59857000  | 0.00016300  |
| N | 1.79681400  | 1.48766900  | 0.00010400  |
| N | 2.89581600  | -0.52633500 | -0.00010500 |
| N | 0.11566900  | -1.68306600 | 0.00041600  |
| H | -0.84053600 | -2.03330600 | -0.00006100 |
| H | 0.92349000  | -2.28829300 | 0.00031500  |
| C | -1.94154000 | 0.18988700  | -0.00001800 |
| C | 1.65614000  | 0.17036100  | 0.00011500  |
| C | 0.28481200  | -0.36164700 | 0.00010900  |
| N | -2.94593700 | 1.08911500  | -0.00008100 |
| H | -2.89687500 | 2.09609400  | 0.00000300  |

**4-b**

|   |             |             |             |
|---|-------------|-------------|-------------|
| O | 3.54904900  | -1.18751000 | -0.00002800 |
| O | 1.60668800  | -2.14999300 | -0.00002900 |
| N | -2.55266100 | 0.97897100  | -0.00001200 |
| N | -3.86862000 | 0.68402100  | -0.00001400 |
| N | -4.05760200 | -0.58383100 | 0.00000100  |
| N | -0.57255900 | -0.48065800 | 0.00001500  |
| N | 3.38754100  | 1.91217300  | 0.00000500  |

|   |             |             |             |
|---|-------------|-------------|-------------|
| N | 2.62129600  | 1.09019200  | 0.00000800  |
| N | 2.32440000  | -1.17947400 | 0.00003600  |
| N | 0.00582700  | 1.80819800  | -0.00001100 |
| H | -0.97852600 | 2.07576600  | -0.00001900 |
| H | 0.71397500  | 2.52192100  | -0.00002000 |
| C | -1.90287700 | -0.17856800 | 0.00000500  |
| C | 1.71692400  | 0.13392300  | 0.00001800  |
| C | 0.28755100  | 0.48743400  | 0.00000700  |
| N | -2.84150200 | -1.14507700 | 0.00001300  |
| H | -2.71376700 | -2.14601400 | 0.00002700  |

#### 4-c

|   |             |             |             |
|---|-------------|-------------|-------------|
| O | 3.52978800  | -1.22251800 | -0.00020200 |
| O | 1.54864600  | -2.10160700 | 0.00037500  |
| N | -2.82715700 | -1.23317700 | -0.00036700 |
| N | -4.03593100 | -0.62925000 | -0.00029200 |
| N | -3.92783500 | 0.64731200  | 0.00003700  |
| N | 3.43924200  | 1.91733000  | -0.00039800 |
| N | 2.66349800  | 1.10851600  | -0.00016200 |
| N | 2.31480600  | -1.14958600 | 0.00011300  |
| N | -0.06922400 | 1.80846100  | 0.00026900  |
| H | 0.68765800  | 2.48438200  | 0.00005600  |
| C | -1.95313700 | -0.25151900 | -0.00004200 |
| C | 1.74037900  | 0.16452000  | 0.00011700  |
| C | 0.31846000  | 0.58798800  | 0.00030400  |
| N | -2.60947500 | 0.91616600  | 0.00020500  |
| H | -2.20620900 | 1.84456100  | 0.00048300  |
| N | -0.58787800 | -0.43528800 | 0.00002700  |
| H | -0.26345100 | -1.39528400 | -0.00020800 |

#### 4-TS

|   |             |             |             |
|---|-------------|-------------|-------------|
| N | 2.71122300  | -1.33031100 | 0.04980100  |
| N | 3.92769100  | -0.74228100 | 0.02499900  |
| N | 3.83372700  | 0.53371000  | -0.04454900 |
| N | 0.47979100  | -0.51160100 | -0.03497900 |
| H | 0.13273800  | -1.46570700 | -0.11894700 |
| N | -0.06945000 | 1.75700400  | 0.04823500  |
| N | -2.13242500 | 2.36397600  | -0.11770600 |
| H | -0.35764200 | 2.33212900  | 0.83980000  |
| N | -2.55020600 | 1.28606100  | -0.02790600 |
| N | -2.47043600 | -1.10698700 | 0.00859700  |
| O | -1.72487000 | -2.08694700 | -0.02857900 |

|   |             |             |             |
|---|-------------|-------------|-------------|
| O | -3.68268000 | -1.14652600 | -0.00509100 |
| C | -1.83407600 | 0.15430000  | 0.07186900  |
| C | -0.41819500 | 0.48364100  | 0.07718300  |
| C | 1.85246300  | -0.34168600 | -0.00947300 |
| N | 2.51967700  | 0.81791800  | -0.06911900 |
| H | 2.13700500  | 1.75141600  | -0.15056800 |

**5-a**

|   |             |             |             |
|---|-------------|-------------|-------------|
| N | -2.75023800 | -1.15423800 | -0.64162400 |
| N | -3.92867300 | -0.58704500 | -0.28575600 |
| N | -3.76006200 | 0.42024000  | 0.47952600  |
| N | -0.46997700 | -0.68099100 | -0.06999200 |
| H | -0.12794400 | -1.62750800 | -0.20198100 |
| N | 0.25657400  | 1.62241000  | -0.23749100 |
| N | 1.43379400  | 2.32154100  | -0.23960900 |
| H | -0.60592300 | 2.10684100  | -0.44579800 |
| N | 2.38330700  | 1.47874800  | -0.10506000 |
| N | 2.61986800  | -0.96210100 | 0.11116700  |
| O | 1.96332900  | -2.00509800 | 0.08430700  |
| O | 3.81827600  | -0.88597500 | 0.23643900  |
| C | 1.85606700  | 0.23443300  | -0.01844100 |
| C | 0.47552200  | 0.29855000  | -0.10765800 |
| C | -1.82737200 | -0.45094600 | -0.03647700 |
| N | -2.42558900 | 0.53887400  | 0.66072000  |
| H | -2.05729900 | 1.17495600  | 1.35409800  |

**5**

|   |             |             |             |
|---|-------------|-------------|-------------|
| N | 2.76193400  | -1.38012500 | 0.00030700  |
| N | 3.94816800  | -0.72959000 | -0.00046500 |
| N | 3.79531400  | 0.53905100  | 0.00048100  |
| N | 0.49498700  | -0.65208900 | 0.00008700  |
| H | 0.16978200  | -1.61112600 | 0.00041800  |
| N | -0.16564400 | 1.63356700  | -0.00031300 |
| N | -1.37162000 | 2.20566000  | -0.00016200 |
| H | -1.47374400 | 3.21046700  | -0.00012100 |
| N | -2.40395400 | 1.41900100  | -0.00063500 |
| N | -2.62481700 | -0.99406900 | 0.00010900  |
| O | -1.96316700 | -2.02773700 | 0.00060600  |
| O | -3.83043700 | -0.91818200 | 0.00001000  |
| C | -1.85410700 | 0.21385500  | -0.00014600 |
| C | -0.44531800 | 0.33211200  | -0.00011100 |
| C | 1.85111500  | -0.43432800 | 0.00011200  |

|   |            |            |             |
|---|------------|------------|-------------|
| N | 2.46313000 | 0.76022700 | -0.00001900 |
| H | 2.06017900 | 1.68673800 | -0.00009200 |

**B**

|   |             |             |             |
|---|-------------|-------------|-------------|
| O | 4.07954700  | 0.23315500  | -0.00128500 |
| O | 3.02264900  | -1.66561500 | 0.00115100  |
| N | 3.07878200  | -0.45033400 | -0.00007100 |
| N | 1.71908100  | 1.56970400  | 0.00019100  |
| N | 0.47826000  | 1.93512200  | 0.00025900  |
| N | -0.25161700 | 0.79375900  | 0.00014500  |
| N | 0.00799600  | -1.58724800 | -0.00003300 |
| N | -4.66117800 | -0.80323800 | -0.00031500 |
| C | -2.08469300 | -0.59094700 | -0.00012300 |
| C | 0.53221500  | -0.33445000 | 0.00005500  |
| C | 1.80673500  | 0.23220600  | 0.00000900  |
| C | -3.50403000 | -0.77862000 | -0.00028700 |
| N | -1.27794700 | -1.68446000 | -0.00012200 |
| C | -1.61000300 | 0.72462300  | 0.00006100  |
| N | -2.30986200 | 1.85313400  | 0.00001800  |
| H | -1.82445700 | 2.73988600  | 0.00131300  |
| H | -3.31905300 | 1.81784600  | 0.00096100  |

**C**

|   |             |             |             |
|---|-------------|-------------|-------------|
| O | -3.96018700 | -0.34647100 | -0.00230700 |
| O | -2.56377000 | -2.00941300 | 0.00203900  |
| N | -2.83518100 | -0.83158500 | -0.00008500 |
| N | -2.16703400 | 1.36982900  | -0.00091500 |
| N | -2.51785500 | 2.43172500  | 0.00153400  |
| N | 0.41526800  | 1.01527700  | 0.00024300  |
| N | 0.14237400  | -1.37140100 | -0.00020000 |
| N | 4.82898400  | -0.70988900 | -0.00024200 |
| C | 2.24937000  | -0.48152900 | -0.00010700 |
| C | -0.30964500 | -0.11231100 | 0.00018000  |
| C | -1.74937800 | 0.11367200  | 0.00037600  |
| C | 3.67208700  | -0.67834900 | -0.00013700 |
| N | 1.45209000  | -1.53455600 | -0.00026900 |
| C | 1.73190000  | 0.84941600  | 0.00002800  |
| N | 2.53418300  | 1.92195100  | -0.00012700 |
| H | 2.11832700  | 2.83961500  | 0.00040400  |
| H | 3.53752200  | 1.82261200  | 0.00012400  |

**D**

|   |             |             |             |
|---|-------------|-------------|-------------|
| O | -3.86765500 | 0.64369100  | 0.00012100  |
| O | -2.20971300 | 2.04612700  | -0.00038100 |
| N | -2.67666600 | 0.92748100  | -0.00009000 |
| N | -2.37854800 | -1.35519600 | 0.00024800  |
| N | -2.89607300 | -2.34497000 | -0.00098100 |
| N | 0.35292300  | 0.97348400  | -0.00001300 |
| N | 0.21214600  | -1.42162500 | 0.00077000  |
| N | 4.85242500  | -0.54645700 | -0.00078000 |
| C | 2.26567400  | -0.44062900 | 0.00014700  |
| C | -0.30838500 | -0.17531500 | 0.00037900  |
| C | -1.76399800 | -0.17931700 | 0.00007000  |
| C | 3.69519600  | -0.56909900 | -0.00029700 |
| N | 1.51815900  | -1.53449000 | 0.00061200  |
| C | 1.68098800  | 0.85986000  | 0.00007800  |
| N | 2.42012300  | 1.97438800  | 0.00009300  |
| H | 1.94308200  | 2.86292100  | 0.00041400  |
| H | 3.42758100  | 1.93723100  | 0.00038200  |

### 8-TS

|   |             |             |             |
|---|-------------|-------------|-------------|
| N | 0.23638700  | 1.06271800  | -0.00241700 |
| N | 0.17009100  | -1.31979700 | 0.00018200  |
| N | -1.52634200 | -2.47044500 | -0.00080200 |
| N | -2.19734500 | -1.52730600 | -0.00103200 |
| N | -2.86234900 | 0.76528100  | 0.00115100  |
| O | -2.49208100 | 1.92615100  | 0.00475000  |
| O | -4.01961200 | 0.37866700  | -0.00114200 |
| C | -1.84634500 | -0.22794500 | -0.00056400 |
| C | -0.42464300 | -0.09754600 | -0.00078200 |
| C | 1.56038600  | 0.95994200  | -0.00134000 |
| N | 1.46432500  | -1.43979800 | 0.00079300  |
| N | 2.29130400  | 2.07751000  | -0.00301000 |
| H | 1.80577400  | 2.96206500  | -0.00471700 |
| H | 3.29923900  | 2.05097500  | 0.00079900  |
| C | 2.18518600  | -0.33624300 | 0.00067300  |
| C | 3.61653300  | -0.43190000 | 0.00119400  |
| N | 4.77276100  | -0.38379500 | 0.00227400  |

### 8

|   |             |             |             |
|---|-------------|-------------|-------------|
| O | -4.09174400 | 0.08868600  | 0.00002800  |
| O | -2.73847900 | 1.78766000  | -0.00002100 |
| N | -2.98966600 | 0.59374500  | 0.00002700  |
| N | -1.97456600 | -1.62813700 | 0.00001500  |



|   |             |             |             |
|---|-------------|-------------|-------------|
| N | -0.82159400 | -2.19141900 | 0.00004300  |
| N | 0.08939200  | -1.17617200 | -0.00004100 |
| N | 1.39027900  | -1.39583000 | -0.00000900 |
| N | 0.21684600  | 1.19963000  | 0.00003300  |
| N | 2.33089100  | 2.09826500  | -0.00031100 |
| H | 1.90834200  | 3.01444400  | 0.00063000  |
| H | 3.33471100  | 2.00765900  | 0.00143900  |
| N | 4.69612800  | -0.41956900 | 0.00002400  |
| C | 1.51923900  | 1.03290800  | 0.00000500  |
| C | 2.10734900  | -0.31206700 | 0.00001400  |
| C | -0.51081400 | 0.07046700  | -0.00005000 |
| C | -1.85014800 | -0.28197000 | -0.00002800 |
| C | 3.54016700  | -0.44208000 | -0.00003900 |

**Reference:**

1. M. J. Frisch, et al. Gaussian 09, Revision D.01; Gaussian, Inc.: Wallingford, CT, 2013.

## 2. X-ray Crystallography

| Compound                          | 2                                                                                                                                                              | 5                                                                                                                                                                                 | 8                                                                                                                                                         |
|-----------------------------------|----------------------------------------------------------------------------------------------------------------------------------------------------------------|-----------------------------------------------------------------------------------------------------------------------------------------------------------------------------------|-----------------------------------------------------------------------------------------------------------------------------------------------------------|
| CCDC No.                          | 2033555                                                                                                                                                        | 2033556                                                                                                                                                                           | 2033557                                                                                                                                                   |
| Empirical formula                 | C <sub>6</sub> H <sub>20</sub> N <sub>18</sub> Na <sub>2</sub> O <sub>12</sub>                                                                                 | C <sub>5</sub> H <sub>9</sub> N <sub>9</sub> O <sub>3</sub> S                                                                                                                     | C <sub>3</sub> H <sub>2</sub> N <sub>8</sub> O <sub>2</sub>                                                                                               |
| Formula weight                    | 582.38                                                                                                                                                         | 275.27                                                                                                                                                                            | 206.15                                                                                                                                                    |
| Temperature                       | 170 K                                                                                                                                                          | 170(2) K                                                                                                                                                                          | 296 K                                                                                                                                                     |
| Crystal system                    | Orthorhombic                                                                                                                                                   | Triclinic                                                                                                                                                                         | Orthorhombic                                                                                                                                              |
| Space group                       | Pbca                                                                                                                                                           | P <sub>1</sub>                                                                                                                                                                    | P2 <sub>1</sub> 2 <sub>1</sub>                                                                                                                            |
| Unit cell dimensions              | $a = 11.5770(6) \text{ \AA}$ $\alpha = 90^\circ$ .<br>$b = 12.9948(8) \text{ \AA}$ $\beta = 90^\circ$ .<br>$c = 30.5442(18) \text{ \AA}$ $\gamma = 90^\circ$ . | $a = 9.5017(5) \text{ \AA}$ $\alpha = 72.499(2)^\circ$ .<br>$b = 10.4256(6) \text{ \AA}$ $\beta = 84.501(2)^\circ$ .<br>$c = 12.9711(7) \text{ \AA}$ $\gamma = 65.426(2)^\circ$ . | $a = 5.348(10) \text{ \AA}$ $\alpha = 90^\circ$ .<br>$b = 9.841(19) \text{ \AA}$ $\beta = 90^\circ$ .<br>$c = 14.02(3) \text{ \AA}$ $\gamma = 90^\circ$ . |
| Volume                            | 4595.1(5) Å <sup>3</sup>                                                                                                                                       | 1113.82(11) Å <sup>3</sup>                                                                                                                                                        | 738(3) Å <sup>3</sup>                                                                                                                                     |
| Z                                 | 8                                                                                                                                                              | 4                                                                                                                                                                                 | 4                                                                                                                                                         |
| Density (calculated)              | 1.684 g cm <sup>-3</sup> (170 K)                                                                                                                               | 1.642 g cm <sup>-3</sup> (293 K)                                                                                                                                                  | 1.856 g cm <sup>-3</sup> (296 K)                                                                                                                          |
| Crystal size                      | 0.190 x 0.080 x 0.040 mm <sup>3</sup>                                                                                                                          | 0.120 x 0.100 x 0.080 mm <sup>3</sup>                                                                                                                                             | 0.120 x 0.100 x 0.060 mm <sup>3</sup>                                                                                                                     |
| Theta range for data collection   | 2.207 to 27.106°                                                                                                                                               | 2.243 to 26.429°                                                                                                                                                                  | 2.906 to 27.526°                                                                                                                                          |
| Completeness                      | 99.8 % ( $\theta = 25.242^\circ$ )                                                                                                                             | 96.7 % ( $\theta = 25.242^\circ$ )                                                                                                                                                | 99.1 % ( $\theta = 25.242^\circ$ )                                                                                                                        |
| F000                              | 2400.0                                                                                                                                                         | 568.0                                                                                                                                                                             | 416.0                                                                                                                                                     |
| Goodness-of-fit on F <sup>2</sup> | 1.061                                                                                                                                                          | 1.080                                                                                                                                                                             | 0.907                                                                                                                                                     |
| R (reflections)                   | 0.0387(4310)                                                                                                                                                   | 0.0538( 2907)                                                                                                                                                                     | 0.0738( 662)                                                                                                                                              |
| wR <sub>2</sub> (reflections)     | 0.1029(5608)                                                                                                                                                   | 0.1393( 4428)                                                                                                                                                                     | 0.1942( 1675)                                                                                                                                             |

| Compound                          | 9                                                                                                                                                              | 10                                                                                                                                                             | 16                                                                                                                                                          |
|-----------------------------------|----------------------------------------------------------------------------------------------------------------------------------------------------------------|----------------------------------------------------------------------------------------------------------------------------------------------------------------|-------------------------------------------------------------------------------------------------------------------------------------------------------------|
| CCDC No.                          | 1997519                                                                                                                                                        | 1997520                                                                                                                                                        | 2033570                                                                                                                                                     |
| Empirical formula                 | C <sub>7</sub> H <sub>10</sub> N <sub>11</sub> O <sub>3</sub> S                                                                                                | C <sub>7</sub> H <sub>12</sub> N <sub>12</sub> O <sub>4</sub>                                                                                                  | C <sub>5</sub> H <sub>5</sub> N <sub>7</sub> O <sub>3</sub>                                                                                                 |
| Formula weight                    | 328.32                                                                                                                                                         | 328.29                                                                                                                                                         | 211.16                                                                                                                                                      |
| Temperature                       | 296(2) K                                                                                                                                                       | 296(2)K                                                                                                                                                        | 140 K                                                                                                                                                       |
| Crystal system                    | Monoclinic                                                                                                                                                     | Monoclinic                                                                                                                                                     | Orthorhombic                                                                                                                                                |
| Space group                       | P2 <sub>1</sub>                                                                                                                                                | P2 <sub>1</sub> /c                                                                                                                                             | Pbca                                                                                                                                                        |
| Unit cell dimensions              | $a = 6.423(7) \text{ \AA}$ $\alpha = 90^\circ$ .<br>$b = 9.662(10) \text{ \AA}$ $\beta = 94.020(15)^\circ$ .<br>$c = 10.780 \text{ \AA}$ $\gamma = 90^\circ$ . | $a = 10.869 \text{ \AA}$ $\alpha = 90^\circ$ .<br>$b = 17.502(6) \text{ \AA}$ $\beta = 102.927(6)^\circ$ .<br>$c = 7.255(2) \text{ \AA}$ $\gamma = 90^\circ$ . | $a = 15.886(4) \text{ \AA}$ $\alpha = 90^\circ$ .<br>$b = 6.0794(15) \text{ \AA}$ $\beta = 90^\circ$ .<br>$c = 16.529(4) \text{ \AA}$ $\gamma = 90^\circ$ . |
| Volume                            | 667.4(12) Å <sup>3</sup>                                                                                                                                       | 1345.1(8) Å <sup>3</sup>                                                                                                                                       | 1596.4(7) Å <sup>3</sup>                                                                                                                                    |
| Z                                 | 2                                                                                                                                                              | 4                                                                                                                                                              | 8                                                                                                                                                           |
| Density (calculated)              | 1.634 g cm <sup>-3</sup> (296 K)                                                                                                                               | 1.621 g cm <sup>-3</sup> (296 K)                                                                                                                               | 1.766 g cm <sup>-3</sup> (296 K)                                                                                                                            |
| Crystal size                      | 0.15 x 0.12 x 0.04 mm <sup>3</sup>                                                                                                                             | 0.12 x 0.11 x 0.08 mm <sup>3</sup>                                                                                                                             | 0.100 x 0.070 x 0.050 mm <sup>3</sup>                                                                                                                       |
| Theta range for data collection   | 2.834 to 27.641°                                                                                                                                               | 1.922 to 27.563°                                                                                                                                               | 2.464 to 26.455°                                                                                                                                            |
| Completeness                      | 97.2 % ( $\theta = 25.242^\circ$ )                                                                                                                             | 98.6% ( $\theta = 25.242^\circ$ )                                                                                                                              | 99.9% ( $\theta = 25.242^\circ$ )                                                                                                                           |
| F000                              | 338.0                                                                                                                                                          | 680.0                                                                                                                                                          | 872.0                                                                                                                                                       |
| Goodness-of-fit on F <sup>2</sup> | 0.946                                                                                                                                                          | 0.889                                                                                                                                                          | 0.990                                                                                                                                                       |
| R (reflections)                   | 0.0734(1352)                                                                                                                                                   | 0.0624(1465)                                                                                                                                                   | 0.0578(954)                                                                                                                                                 |
| wR <sub>2</sub> (reflections)     | 0.2153(2795)                                                                                                                                                   | 0.2068(3069)                                                                                                                                                   | 0.1781(1647)                                                                                                                                                |

| Compound                          | 17                                                                                                                                                                | 18                                                                                                                                                                      |
|-----------------------------------|-------------------------------------------------------------------------------------------------------------------------------------------------------------------|-------------------------------------------------------------------------------------------------------------------------------------------------------------------------|
| CCDC No.                          | 2033571                                                                                                                                                           | 2013573                                                                                                                                                                 |
| Empirical formula                 | C <sub>4</sub> H <sub>2</sub> ClN <sub>7</sub> O <sub>2</sub>                                                                                                     | C <sub>4</sub> H <sub>2</sub> N <sub>10</sub> O <sub>2</sub>                                                                                                            |
| Formula weight                    | 215.58                                                                                                                                                            | 222.16                                                                                                                                                                  |
| Temperature                       | 296 K                                                                                                                                                             | 296 K                                                                                                                                                                   |
| Crystal system                    | Monoclinic                                                                                                                                                        | Monoclinic                                                                                                                                                              |
| Space group                       | P2 <sub>1</sub> /c                                                                                                                                                | P2 <sub>1</sub> /n                                                                                                                                                      |
| Unit cell dimensions              | $a = 5.6820(19) \text{ \AA}$ $\alpha = 90^\circ$ .<br>$b = 8.178(3) \text{ \AA}$ $\beta = 95.565(4)^\circ$ .<br>$c = 16.188(5) \text{ \AA}$ $\gamma = 90^\circ$ . | $a = 13.700(5) \text{ \AA}$ $\alpha = 90^\circ$ .<br>$b = 4.2254(16) \text{ \AA}$ $\beta =$<br>$94.885(5)^\circ$ .<br>$c = 14.004(5) \text{ \AA}$ $\gamma = 90^\circ$ . |
| Volume                            | 748.6(4) Å <sup>3</sup>                                                                                                                                           | 807.7(5) Å <sup>3</sup>                                                                                                                                                 |
| Z                                 | 4                                                                                                                                                                 | 4                                                                                                                                                                       |
| Density (calculated)              | 1.913 g cm <sup>-3</sup> (296 K)                                                                                                                                  | 1.827 g cm <sup>-3</sup> (293 K)                                                                                                                                        |
| Crystal size                      | 0.120 x 0.100 x 0.080 mm <sup>3</sup>                                                                                                                             | 0.120 x 0.100 x 0.090 mm <sup>3</sup>                                                                                                                                   |
| Theta range for data collection   | 2.528 to 27.135°                                                                                                                                                  | 1.966 to 27.489°                                                                                                                                                        |
| Completeness                      | 99.3 % ( $\theta = 25.242^\circ$ )                                                                                                                                | 99.1 % ( $\theta = 25.242^\circ$ )                                                                                                                                      |
| F000                              | 432.0                                                                                                                                                             | 448.0                                                                                                                                                                   |
| Goodness-of-fit on F <sup>2</sup> | 1.048                                                                                                                                                             | 1.013                                                                                                                                                                   |
| R (reflections)                   | 0.0350(1367)                                                                                                                                                      | 0.0551(1274)                                                                                                                                                            |
| wR <sub>2</sub> (reflections)     | 0.1034(1648)                                                                                                                                                      | 0.1601(1845)                                                                                                                                                            |

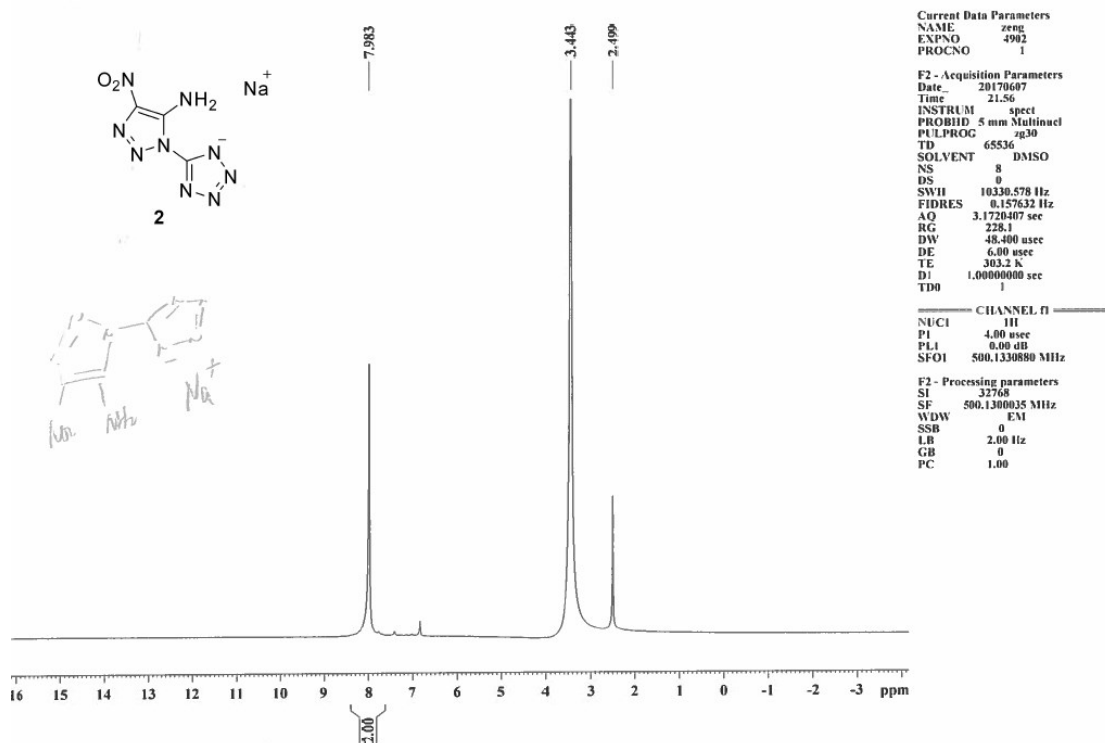

<sup>1</sup>H NMR of compound 2

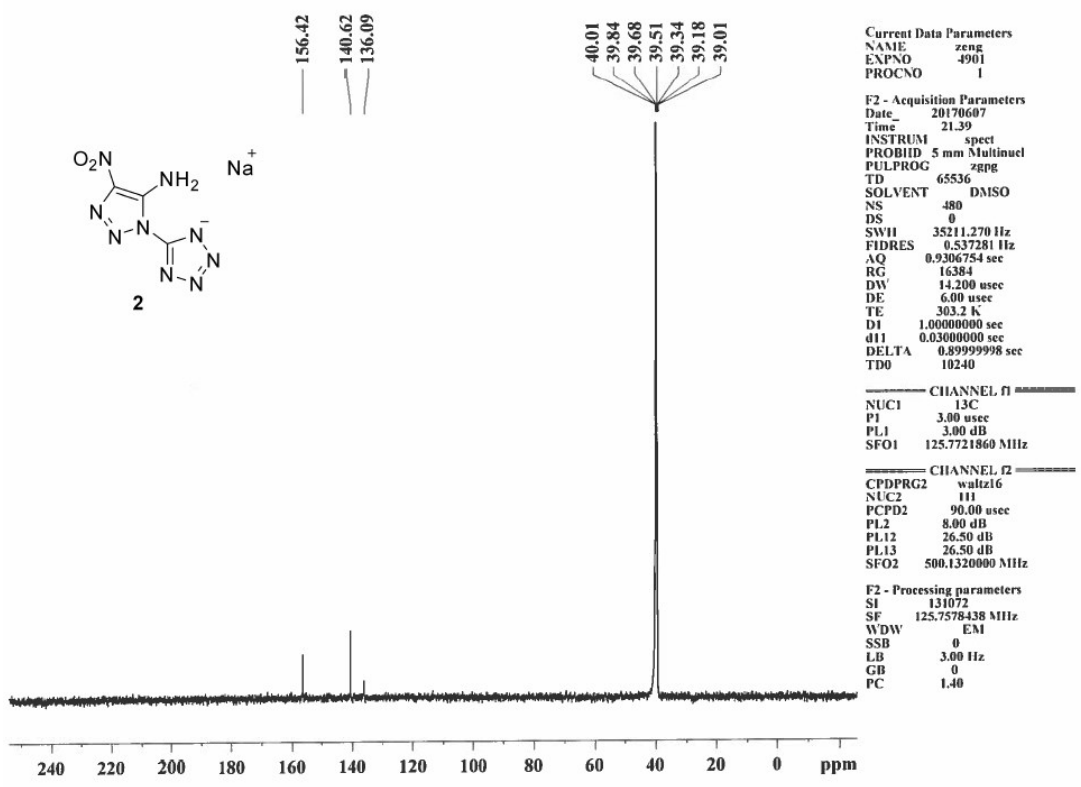

<sup>13</sup>C NMR of compound 2

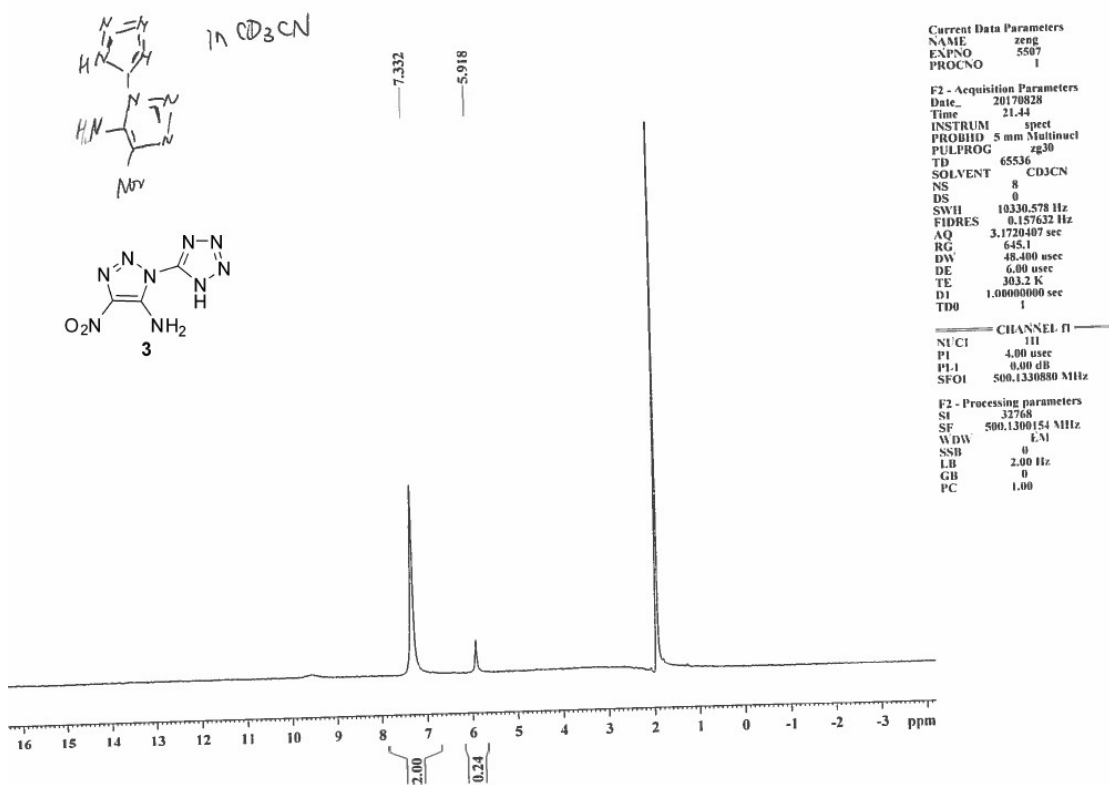

<sup>1</sup>H NMR of compound 3

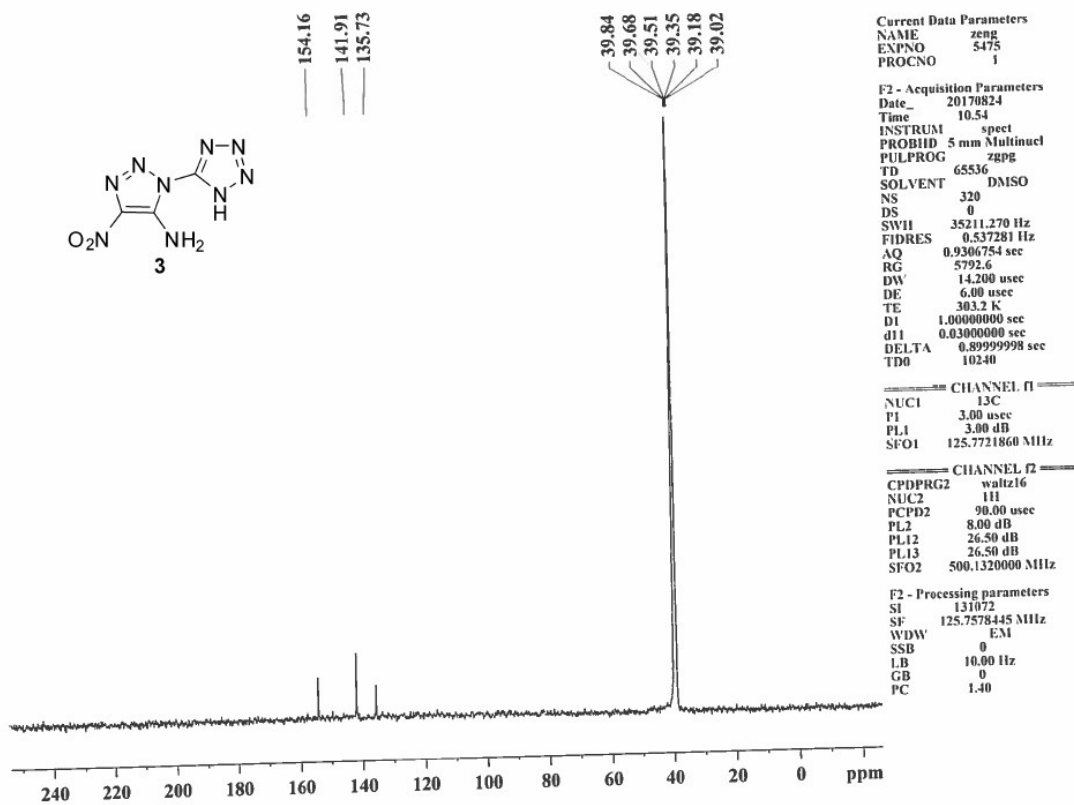

<sup>13</sup>C NMR of compound 3

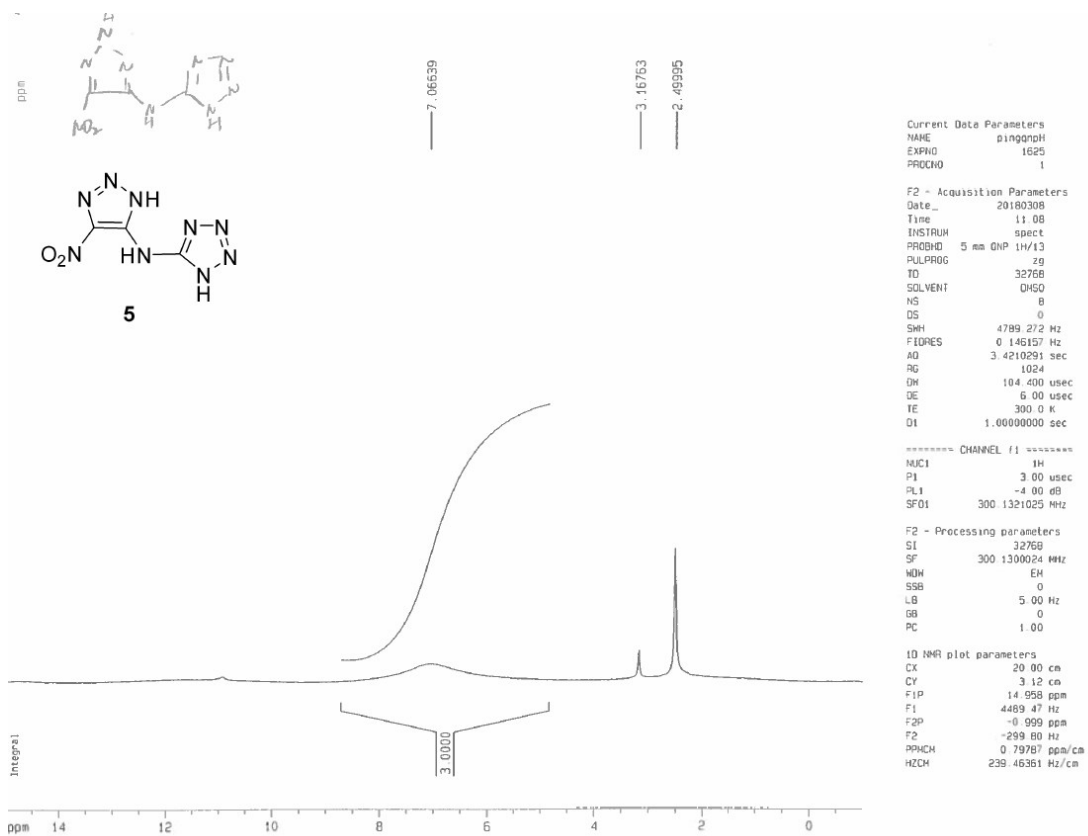

<sup>1</sup>H NMR of compound 5

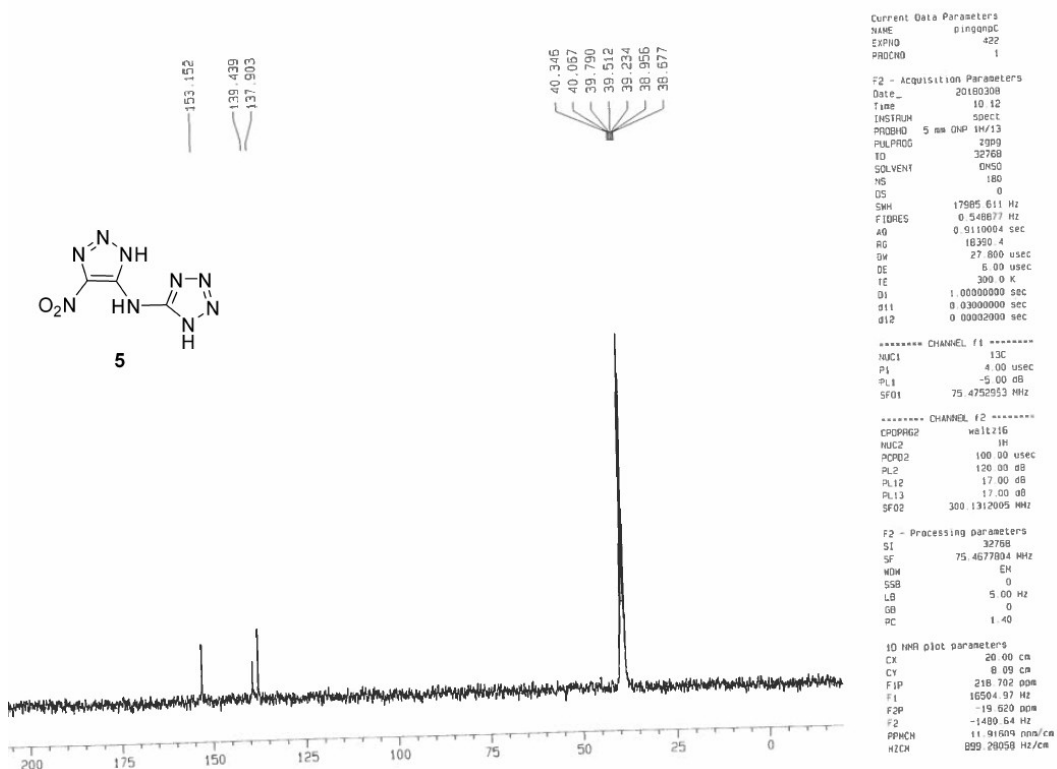

<sup>13</sup>C NMR of compound 5

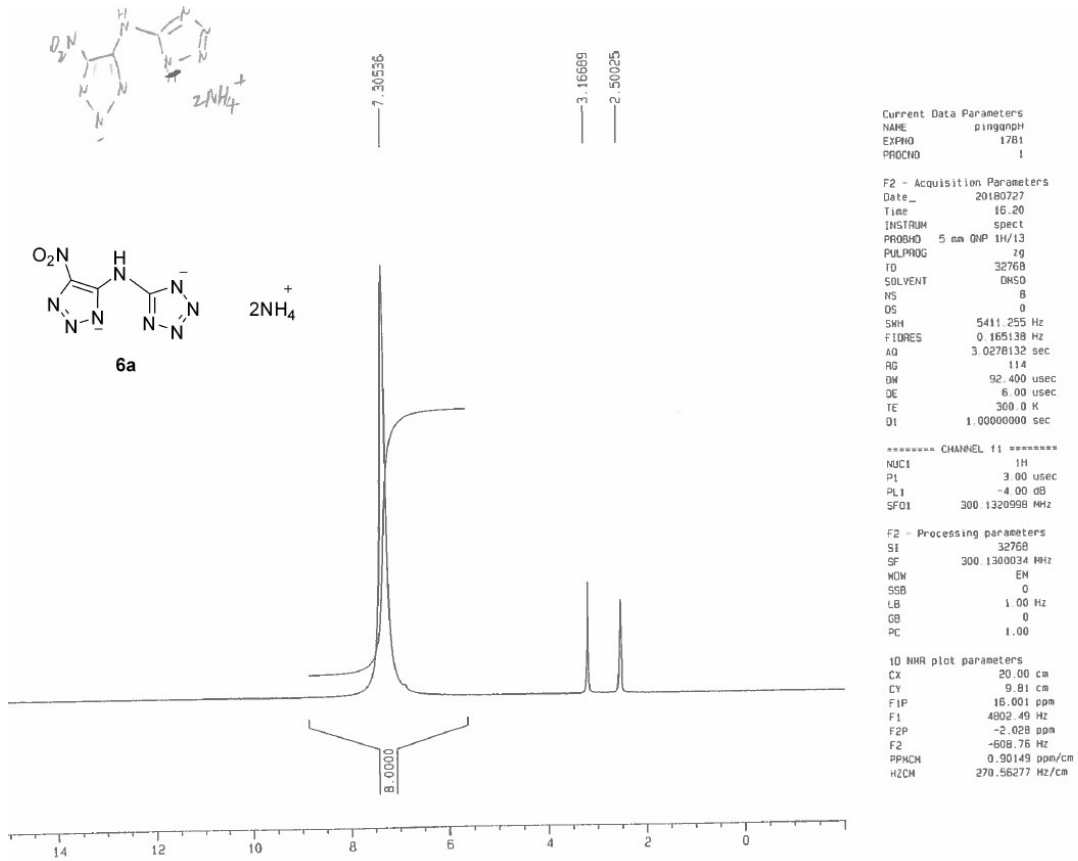

<sup>1</sup>H NMR of compound 6a

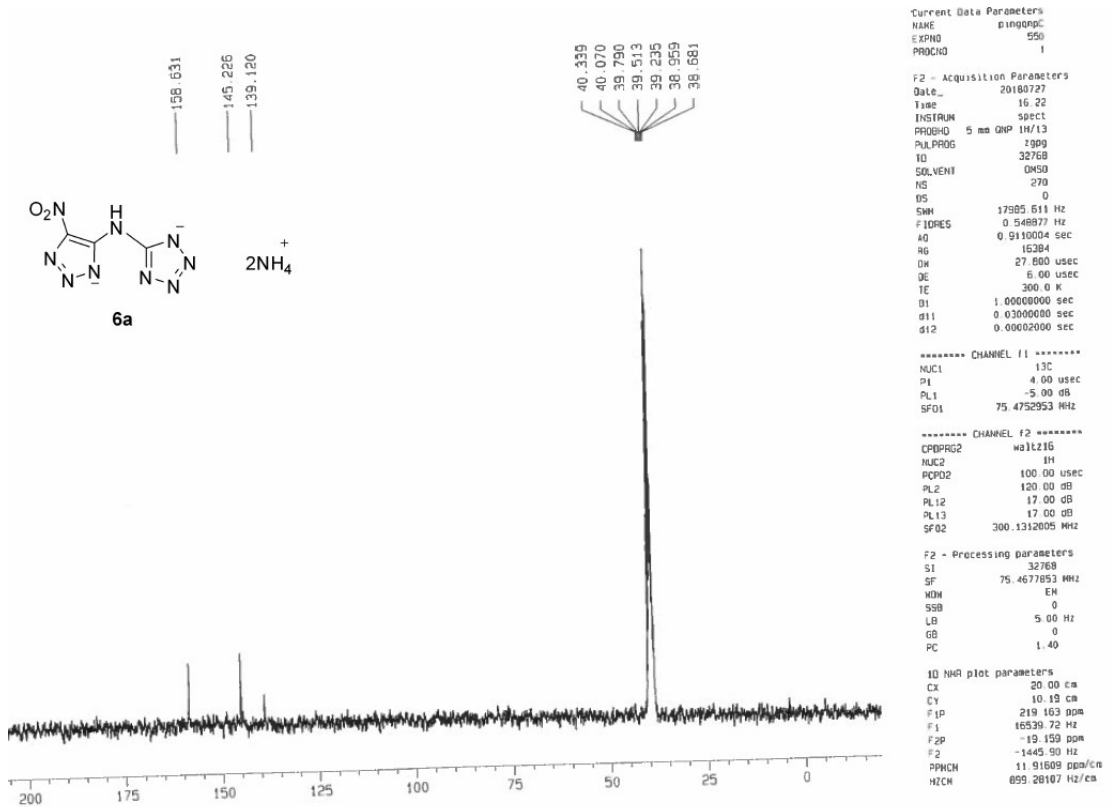

<sup>13</sup>C NMR of compound 6a



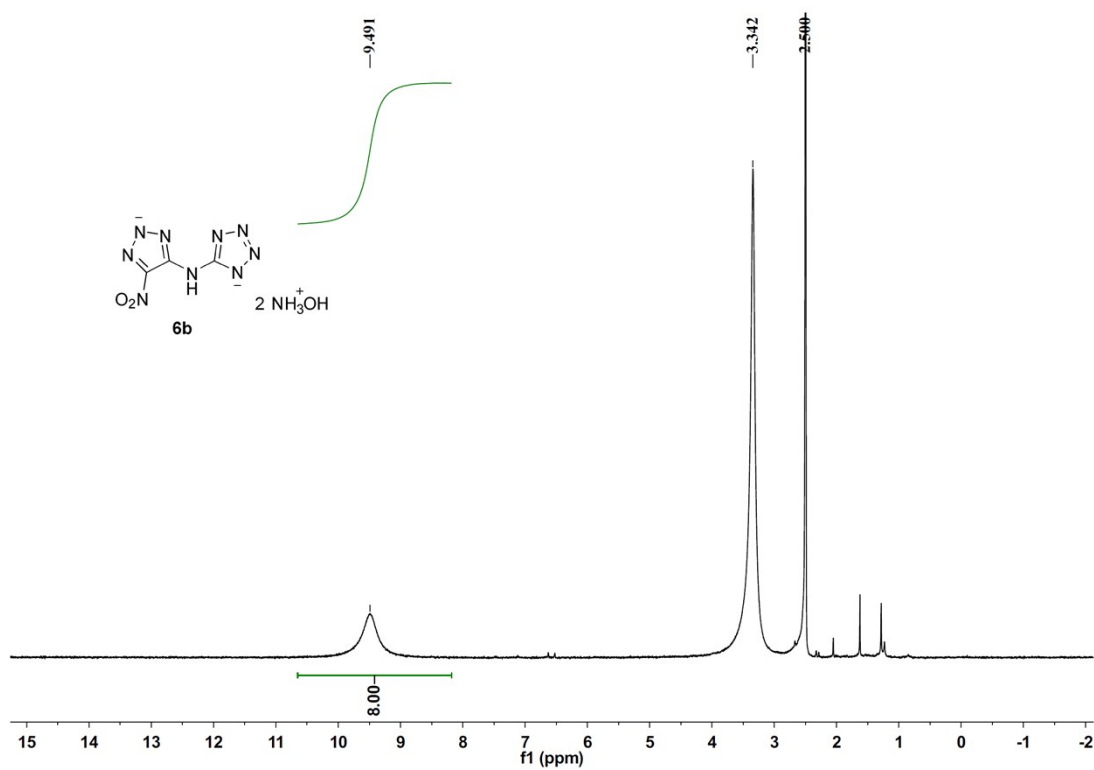

<sup>1</sup>H NMR of compound **6b**

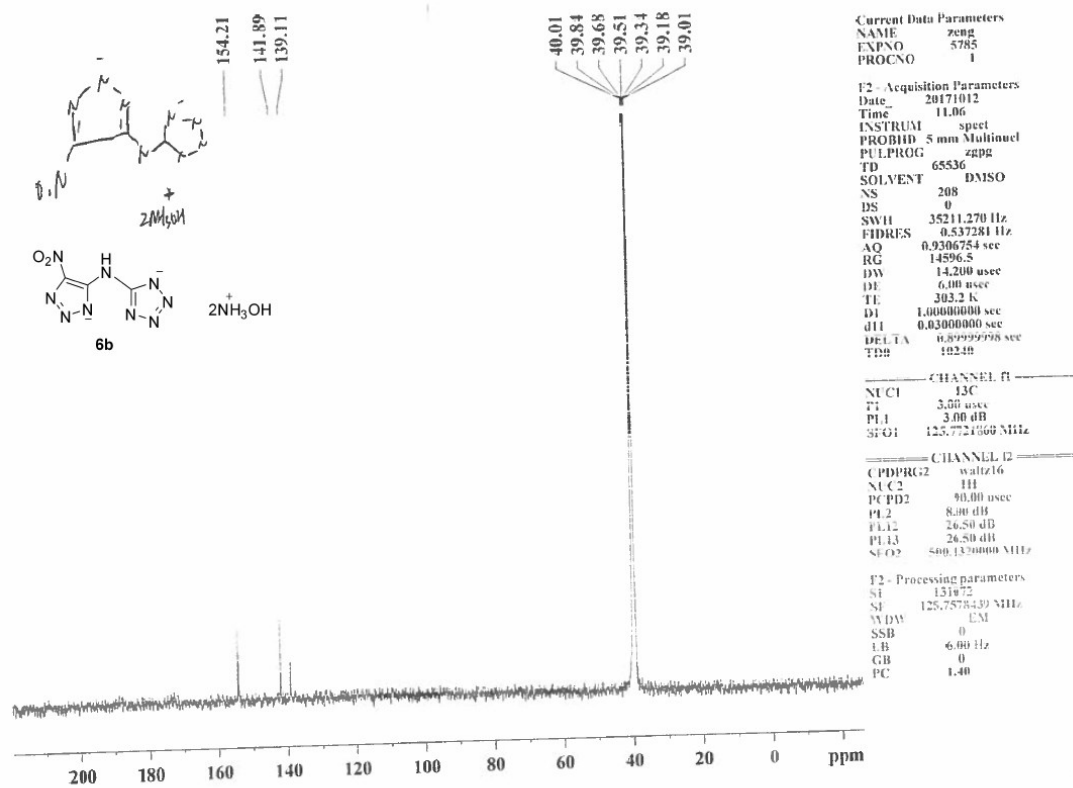

<sup>13</sup>C NMR of compound **6b**

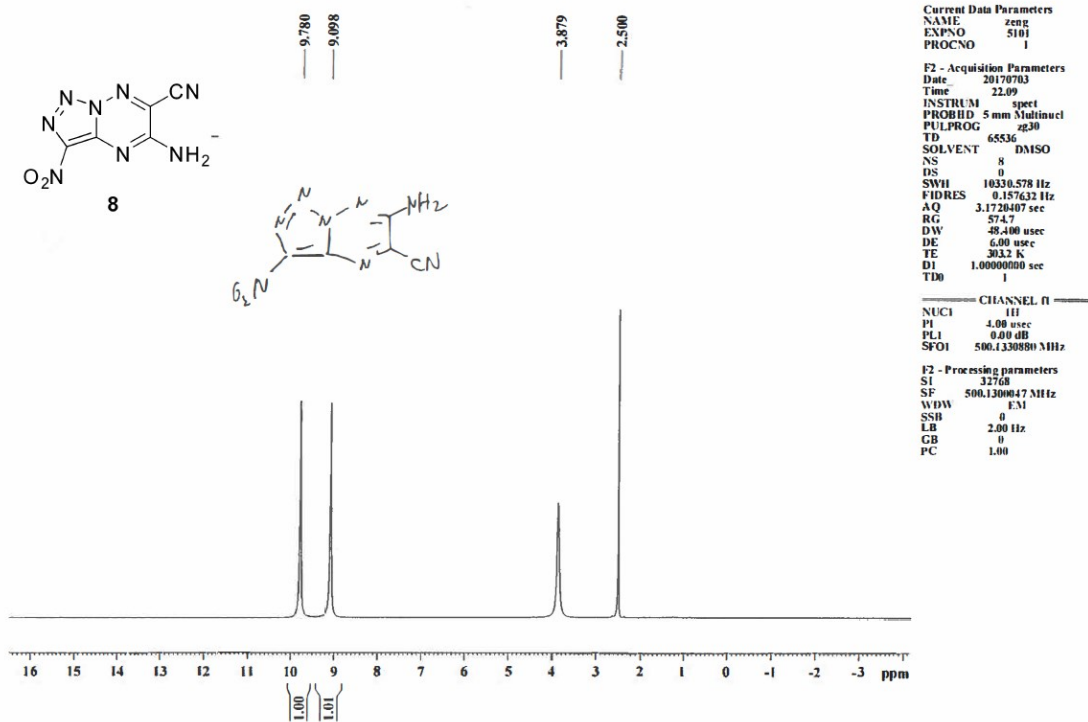

<sup>1</sup>H NMR of compound 8

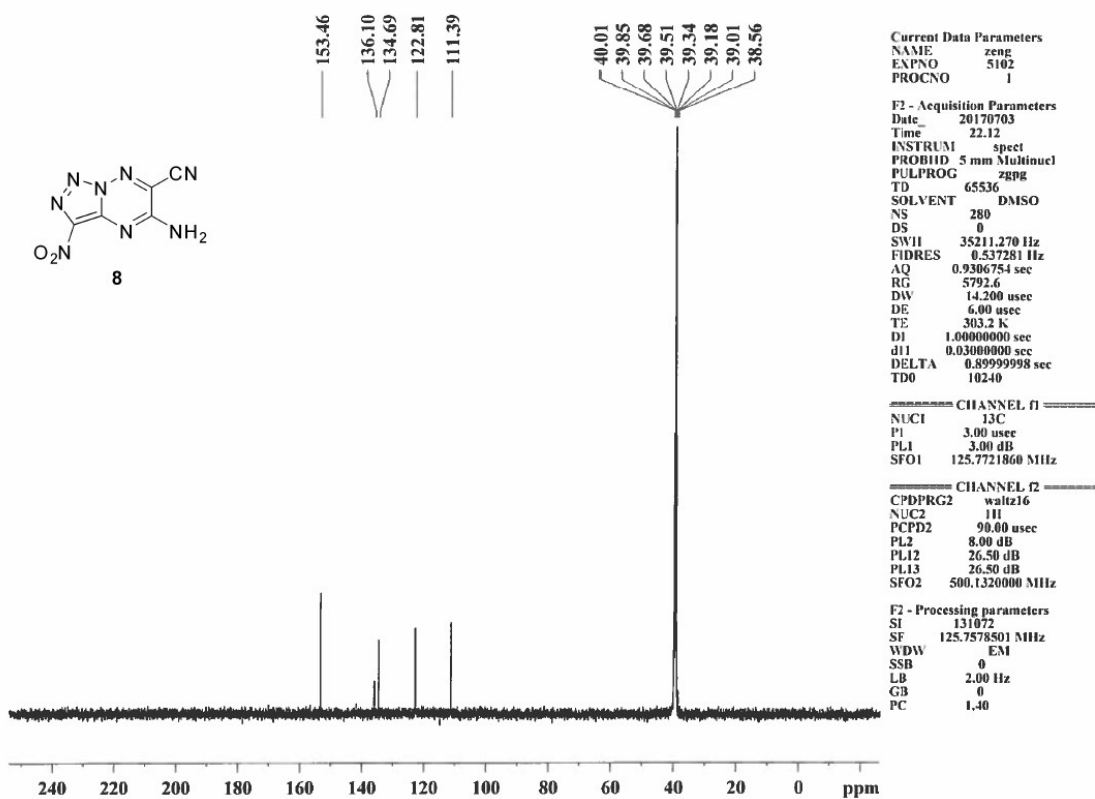

<sup>13</sup>C NMR of compound 8

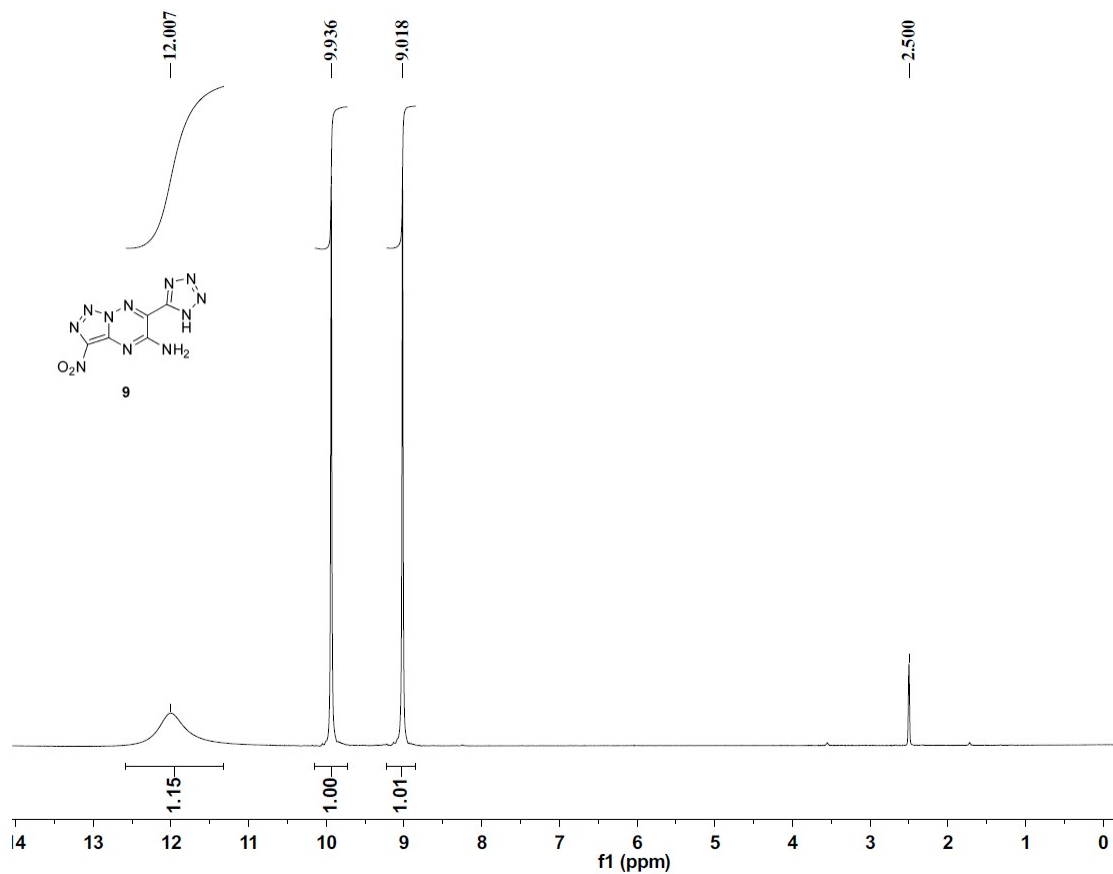

<sup>1</sup>H NMR of compound 9

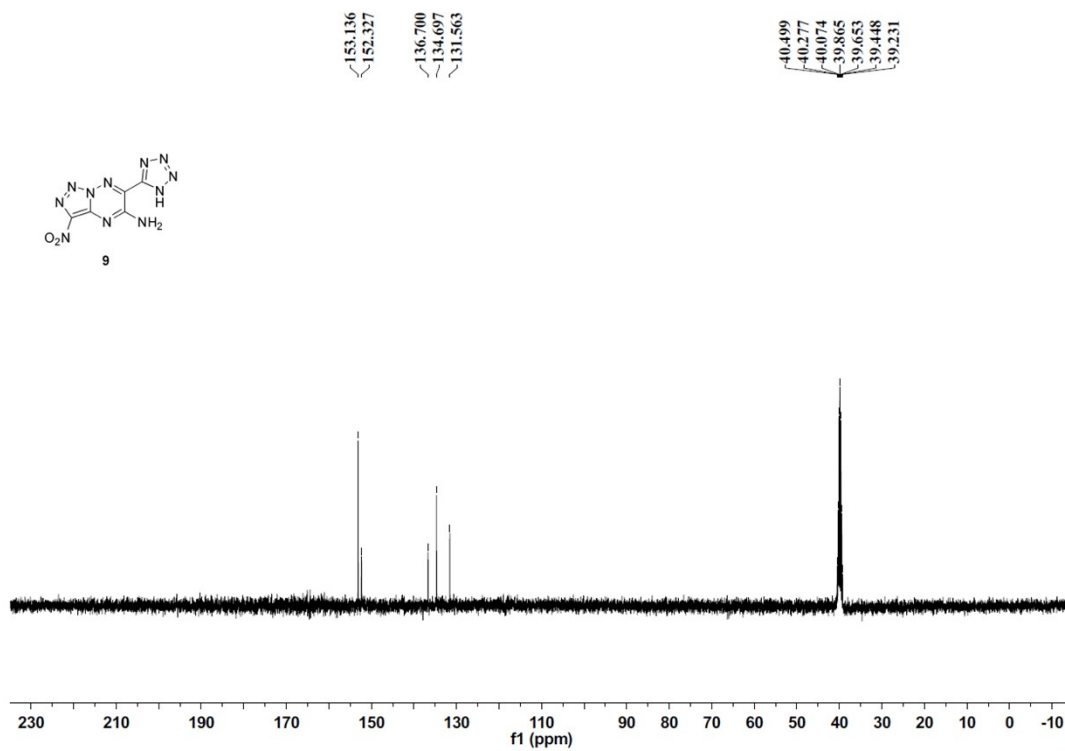

<sup>13</sup>C NMR of compound 9

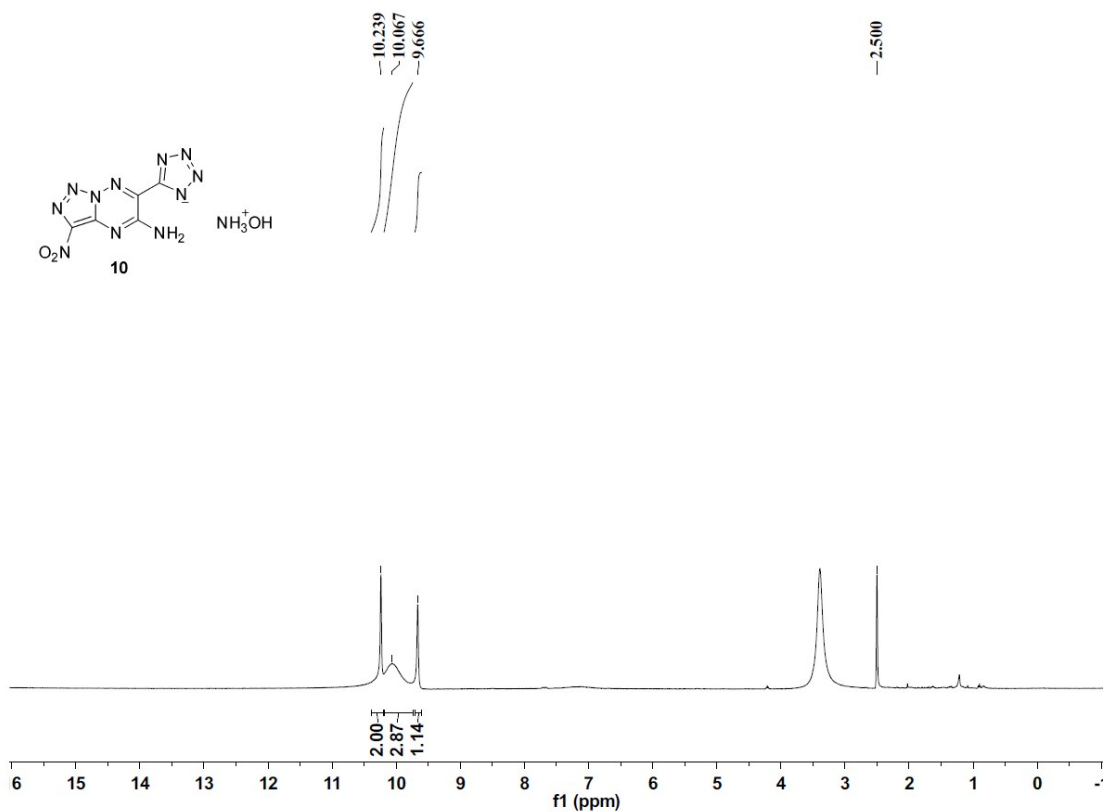

$^1\text{H}$  NMR of compound 10

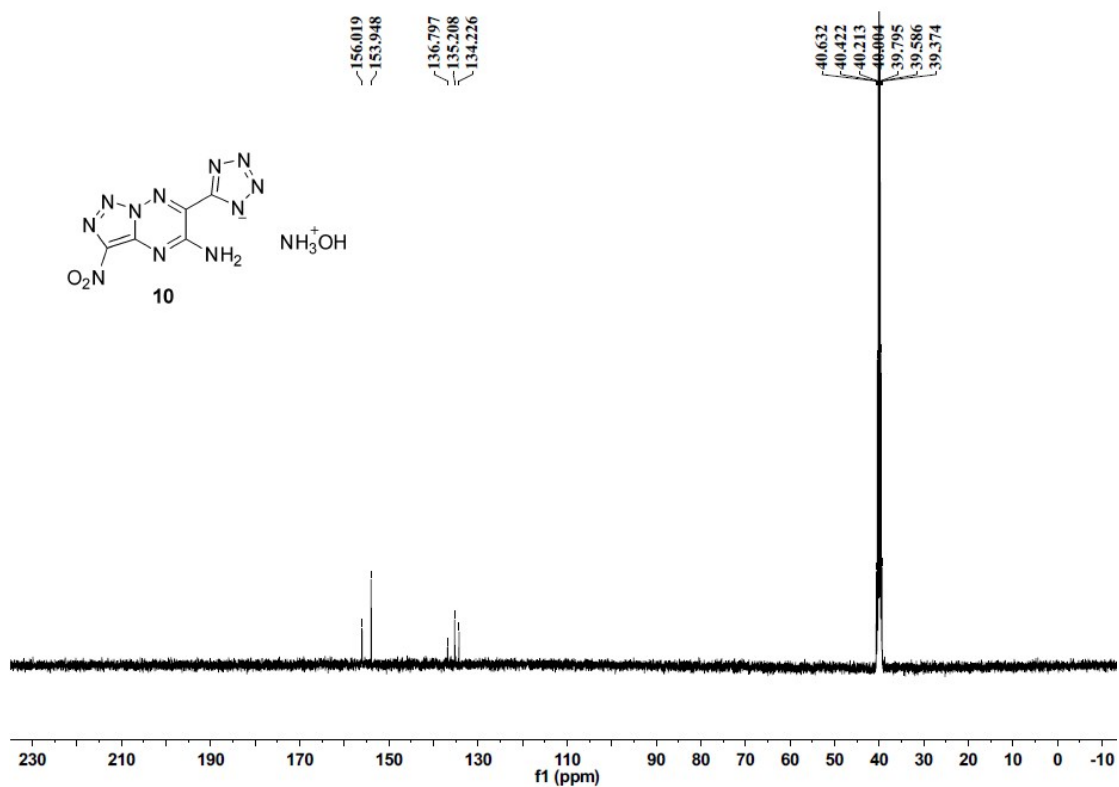

$^{13}\text{C}$  NMR of compound 10

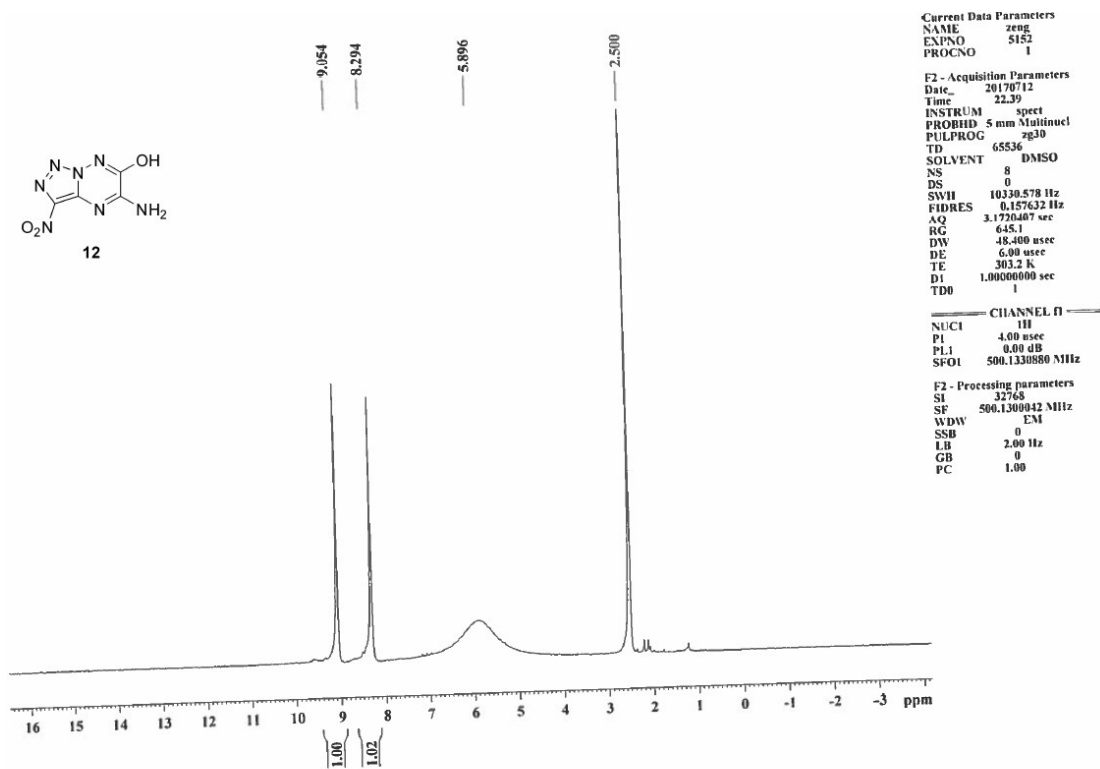

<sup>1</sup>H NMR of compound 12

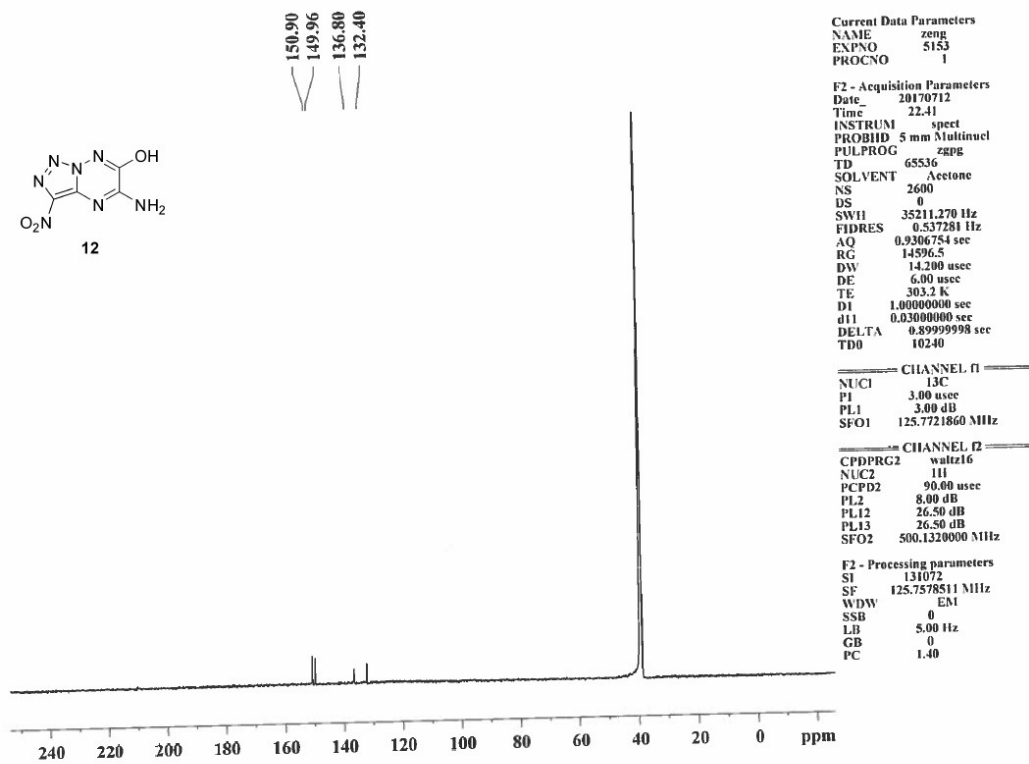

<sup>13</sup>C NMR of compound 12

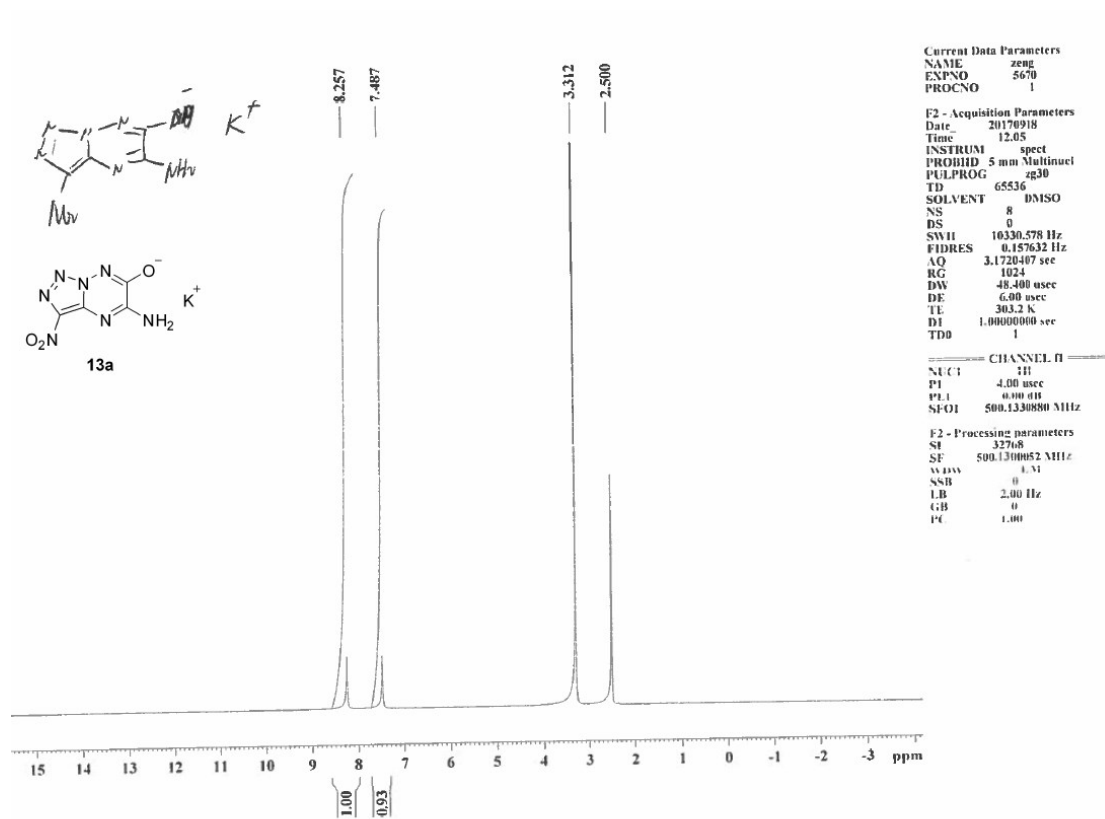

<sup>1</sup>H NMR of compound 13a

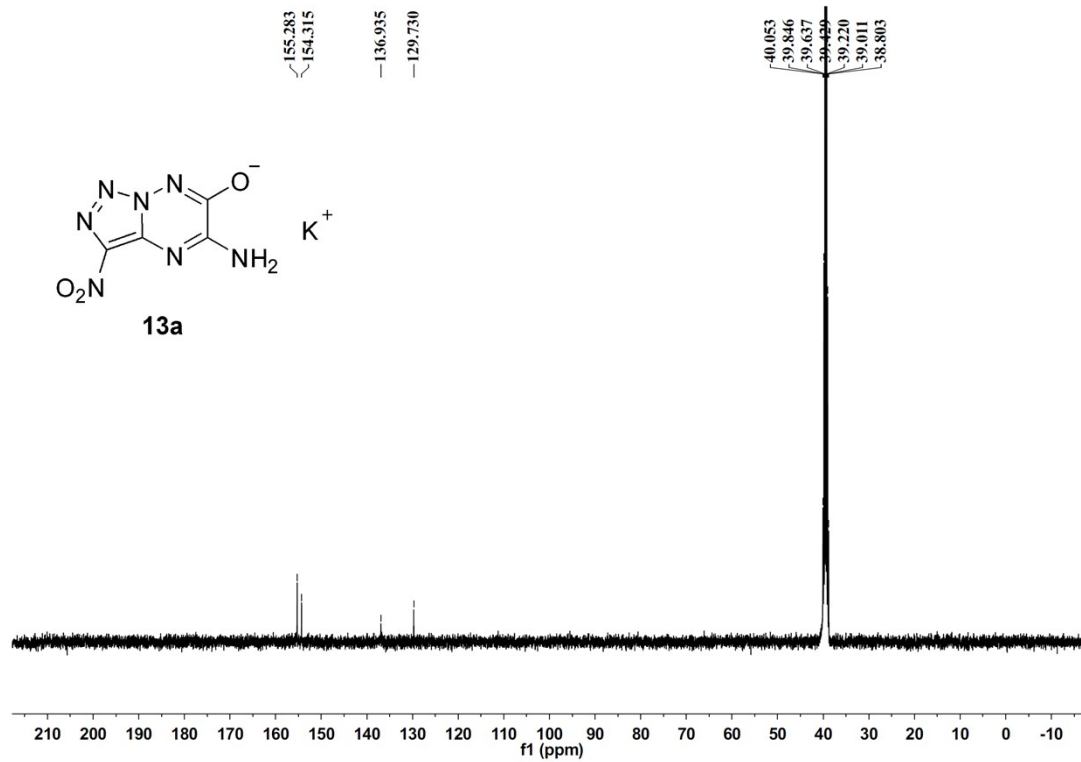

<sup>13</sup>C NMR of compound 13a

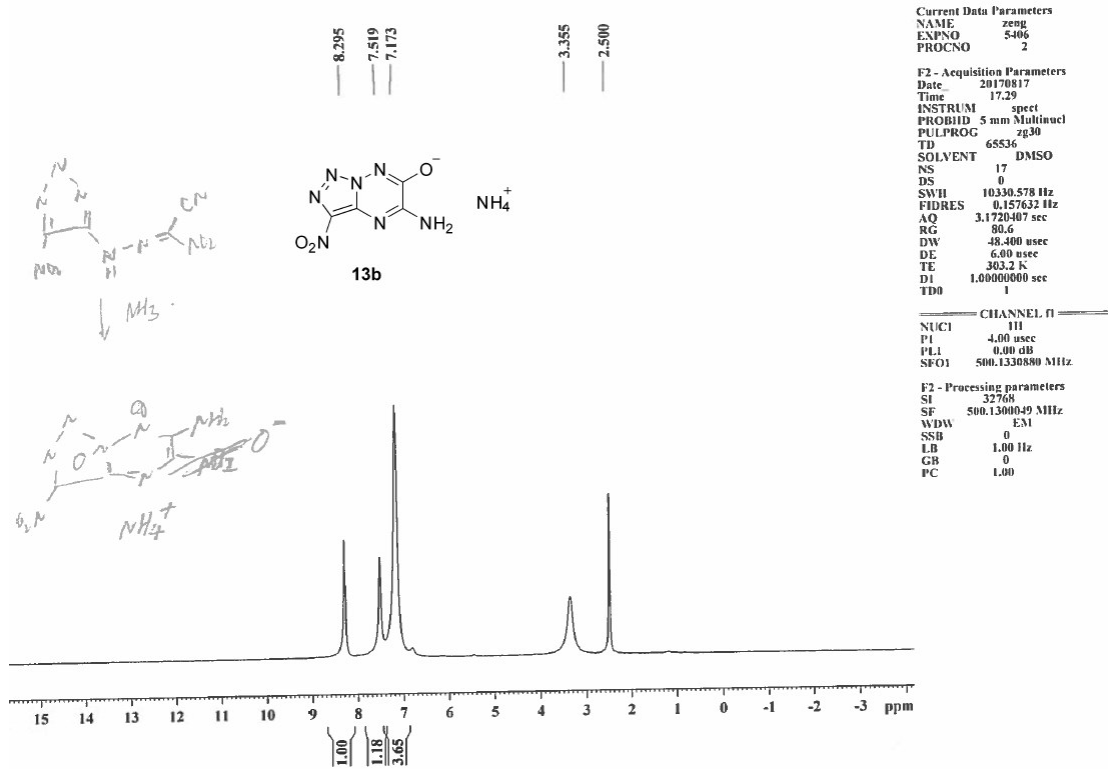

<sup>1</sup>H NMR of compound 13b

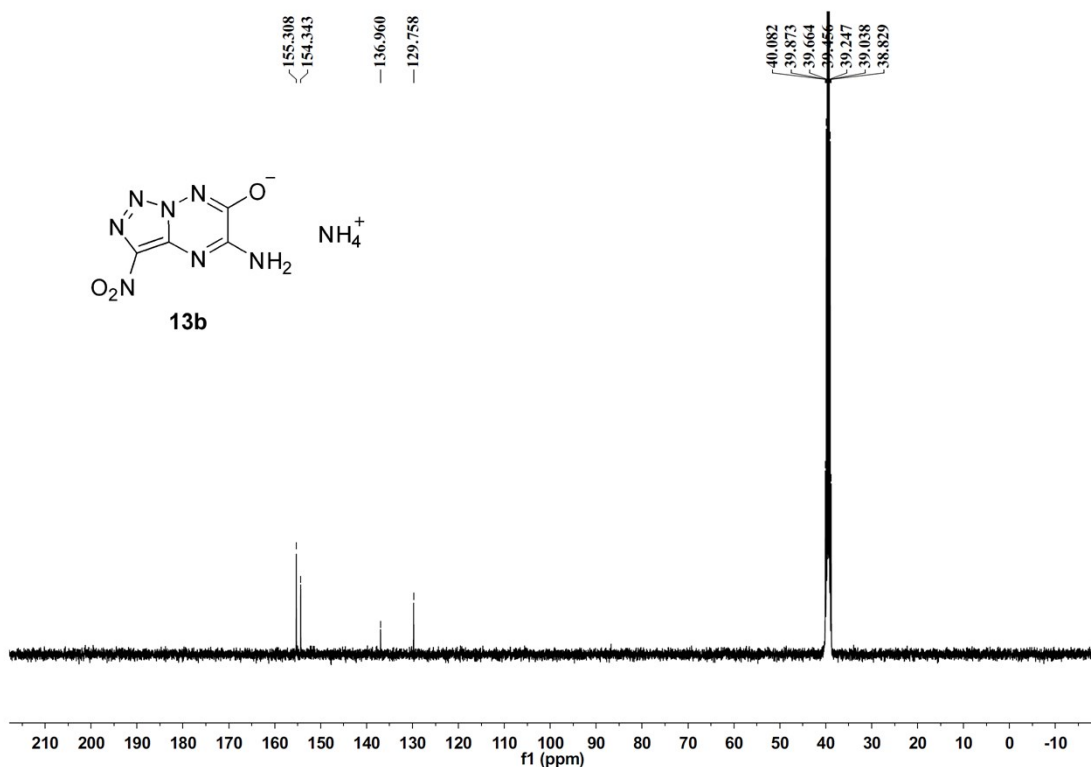

<sup>13</sup>C NMR of compound 13b

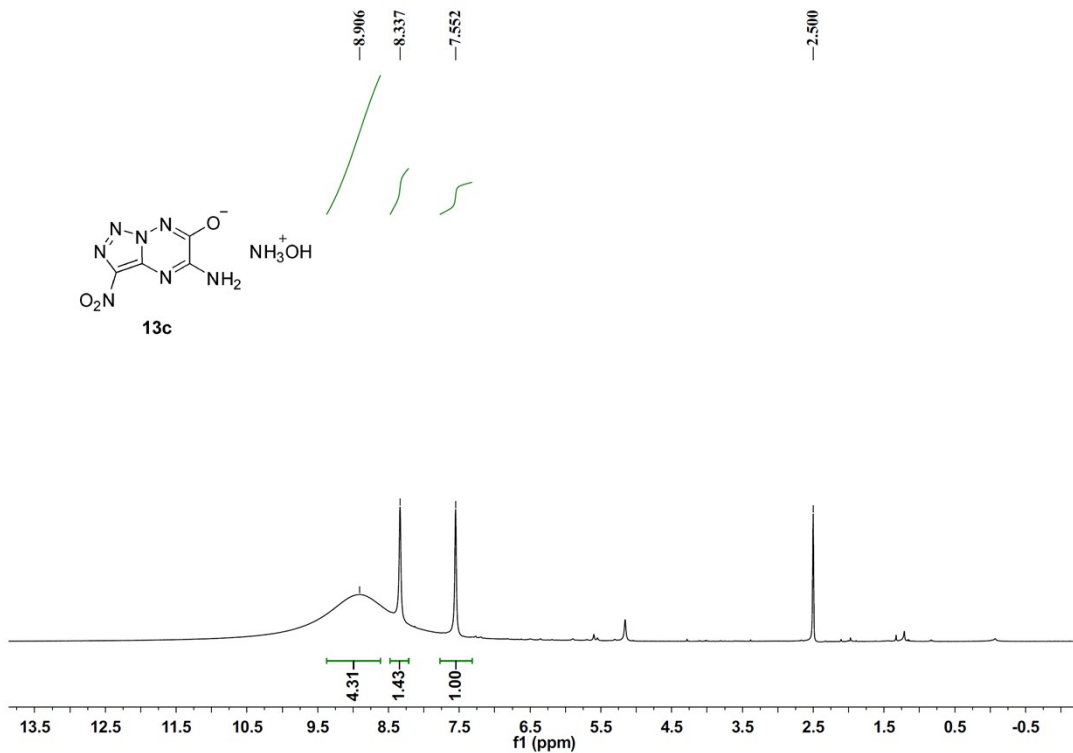

$^1\text{H}$  NMR of compound **13c**

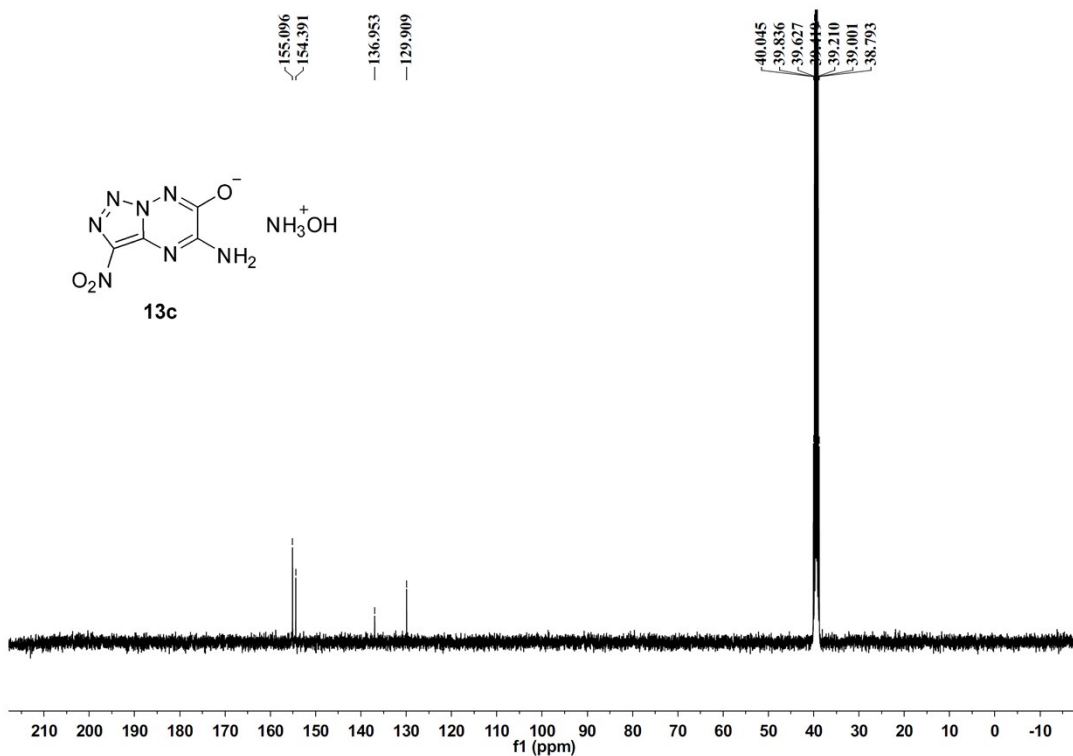

$^{13}\text{C}$  NMR of compound **13c**



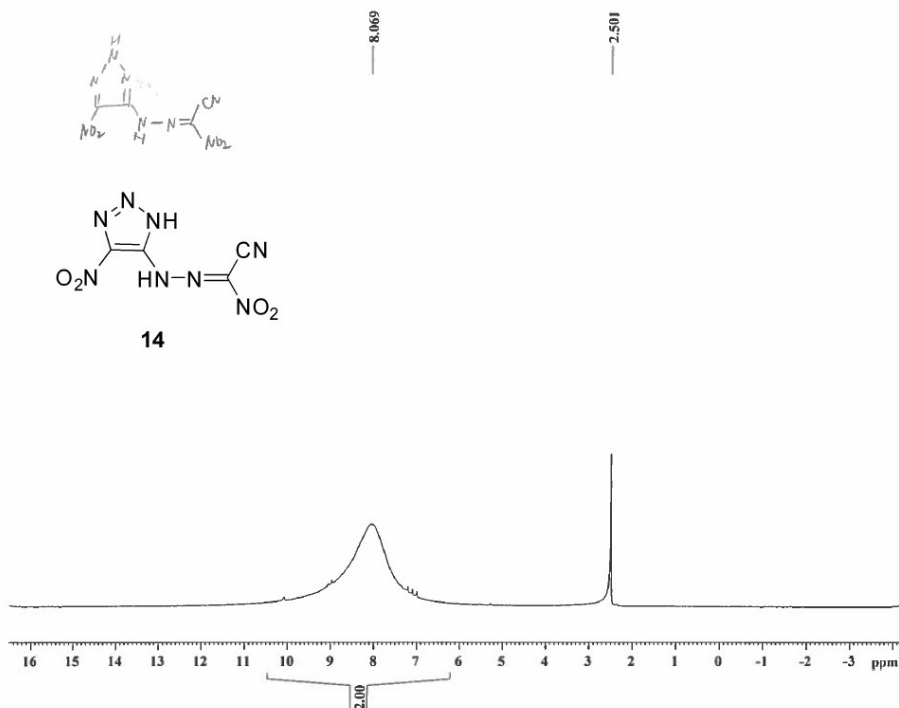

Current Data Parameters  
 NAME zeng  
 EXPNO 4835  
 PROCNO 1

F2 - Acquisition Parameters  
 Date\_ 20170603  
 Time 11.52  
 INSTRUM spect  
 PROBHID 5 mm Multinucl  
 PULPROG zg30  
 TD 65536  
 SOLVENT DMSO  
 NS 8  
 DS 0  
 SWH 10330.578 Hz  
 FIDRES 0.157632 Hz  
 AQ 3.1720407 sec  
 RG 322.5  
 DW -48.400 usec  
 DE 6.00 usec  
 TE 303.2 K  
 D1 1.00000000 sec  
 TDD 1

===== CHANNEL f1 =====  
 NUC1 1H  
 P1 4.00 usec  
 PL1 0.00 dB  
 SFO1 500.1330880 MHz

F2 - Processing parameters  
 SI 32768  
 SF 500.1330833 MHz  
 WDW EM1  
 SSB 0  
 LB 2.00 Hz  
 GB 0  
 PC 1.00

<sup>1</sup>H NMR of compound 14

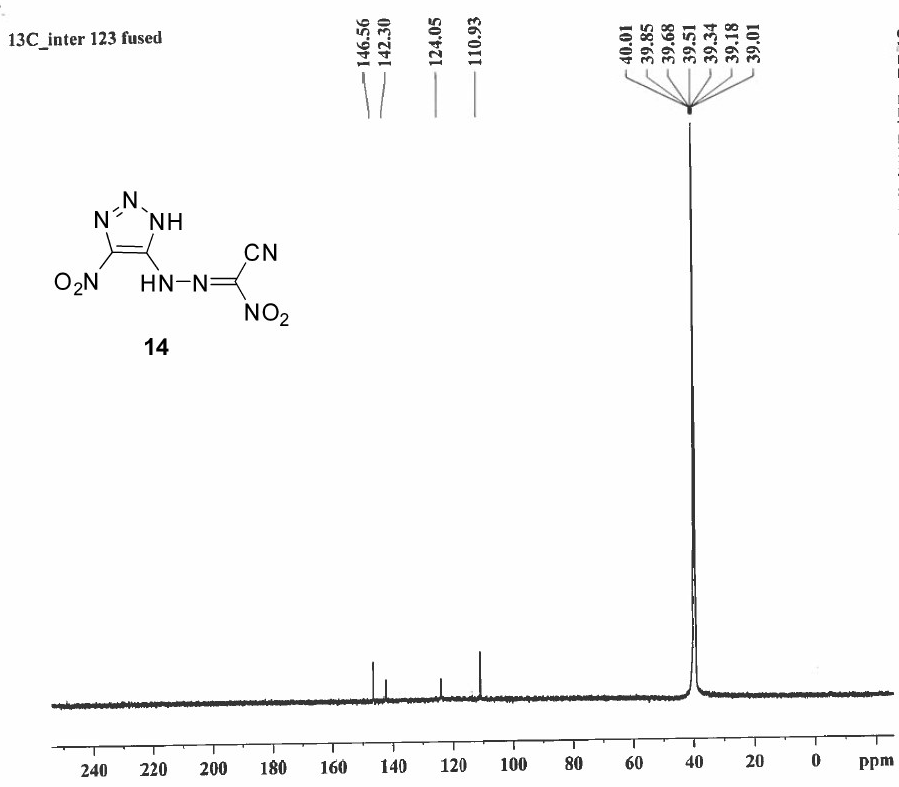

Current Data Parameters  
 NAME zeng  
 EXPNO 4835  
 PROCNO 1

F2 - Acquisition Parameters  
 Date\_ 20170603  
 Time 11.58  
 INSTRUM spect  
 PROBHID 5 mm Multinucl  
 PULPROG zgpg  
 TD 65536  
 SOLVENT DMSO  
 NS 4720  
 DS 0  
 SWH 35211.270 Hz  
 FIDRES 0.537281 Hz  
 AQ 0.9306754 sec  
 RG 9195.2  
 DW 14.200 usec  
 DE 6.00 usec  
 TE 303.2 K  
 D1 1.00000000 sec  
 d11 0.03000000 sec  
 DELTA 0.89999998 sec  
 TDD 10240

===== CHANNEL f1 =====  
 NUC1 13C  
 P1 3.00 usec  
 PL1 3.00 dB  
 SFO1 125.7721860 MHz

===== CHANNEL f2 =====  
 CPDPRG2 waltz16  
 NUC2 1H  
 PCPD2 90.00 usec  
 PL2 8.00 dB  
 PL12 26.50 dB  
 PL13 26.50 dB  
 SFO2 500.1320000 MHz

F2 - Processing parameters  
 SI 131072  
 SF 125.7578275 MHz  
 WDVV EM1  
 SSB 0  
 LB 1.00 Hz  
 GB 0  
 PC 1.40

<sup>13</sup>C NMR of compound 14

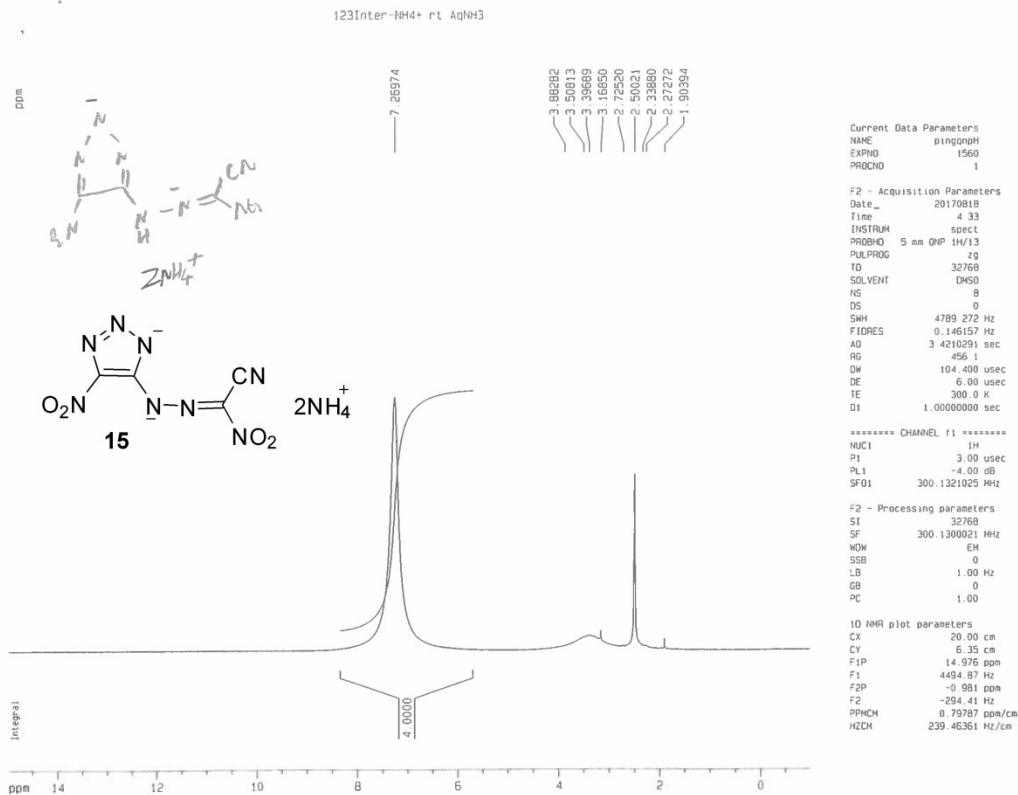

<sup>1</sup>H NMR of compound 15

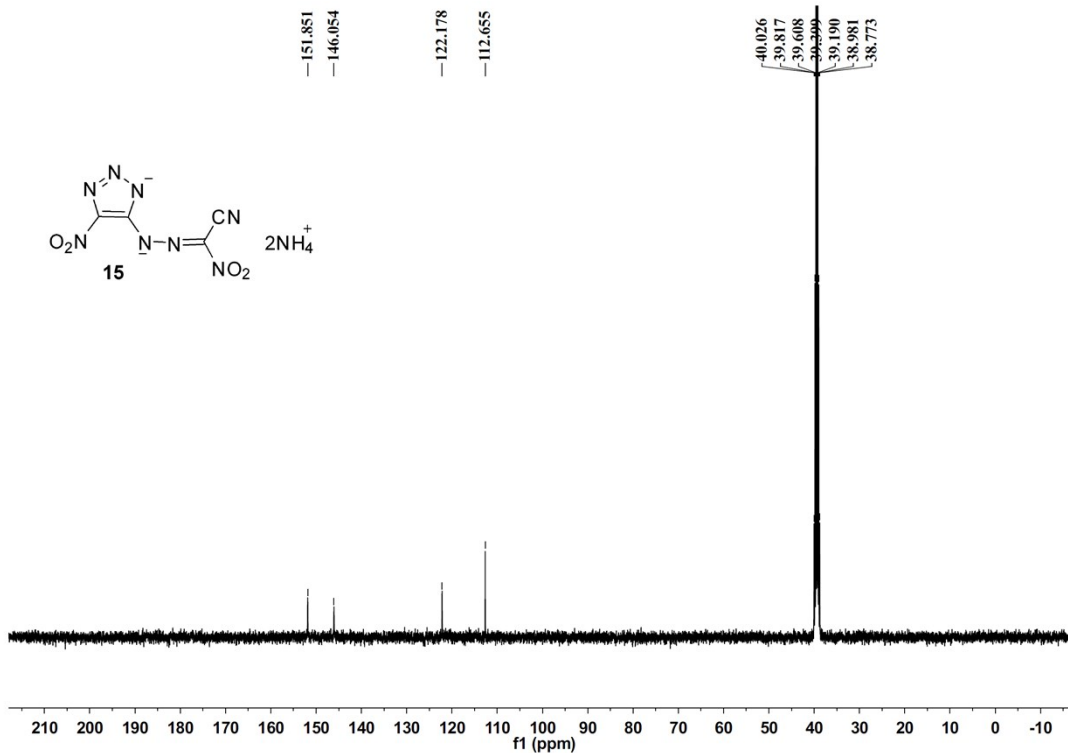

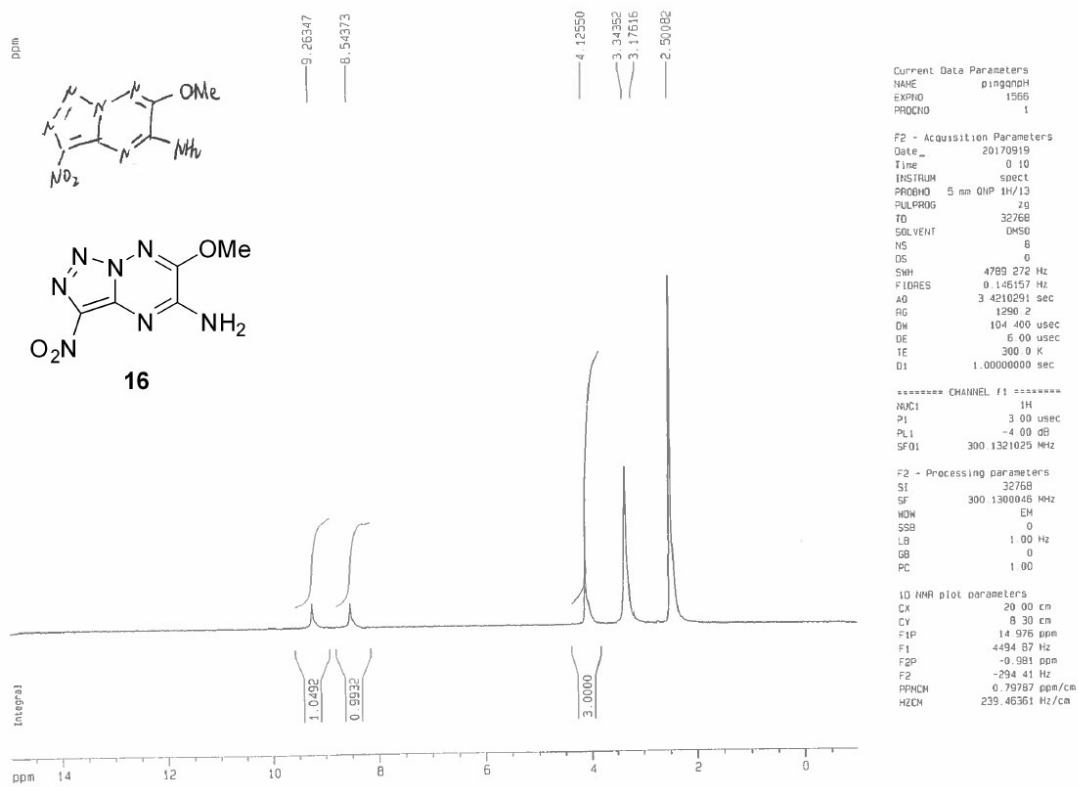

<sup>1</sup>H NMR of compound 16

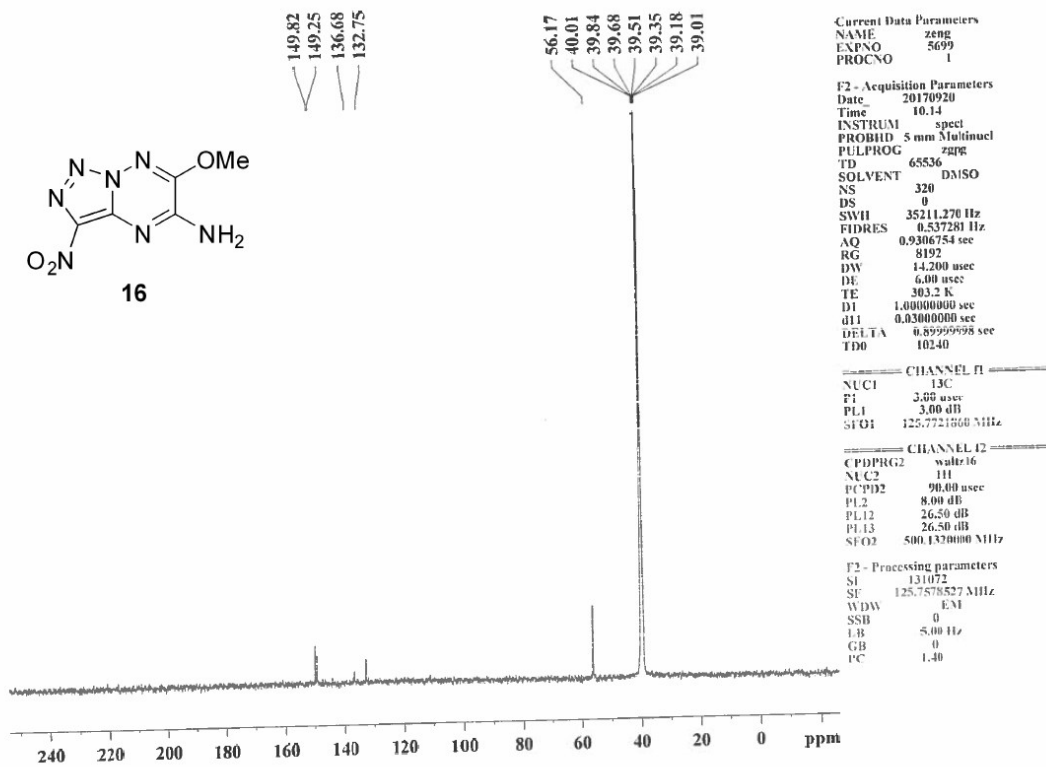

<sup>13</sup>C NMR of compound 16

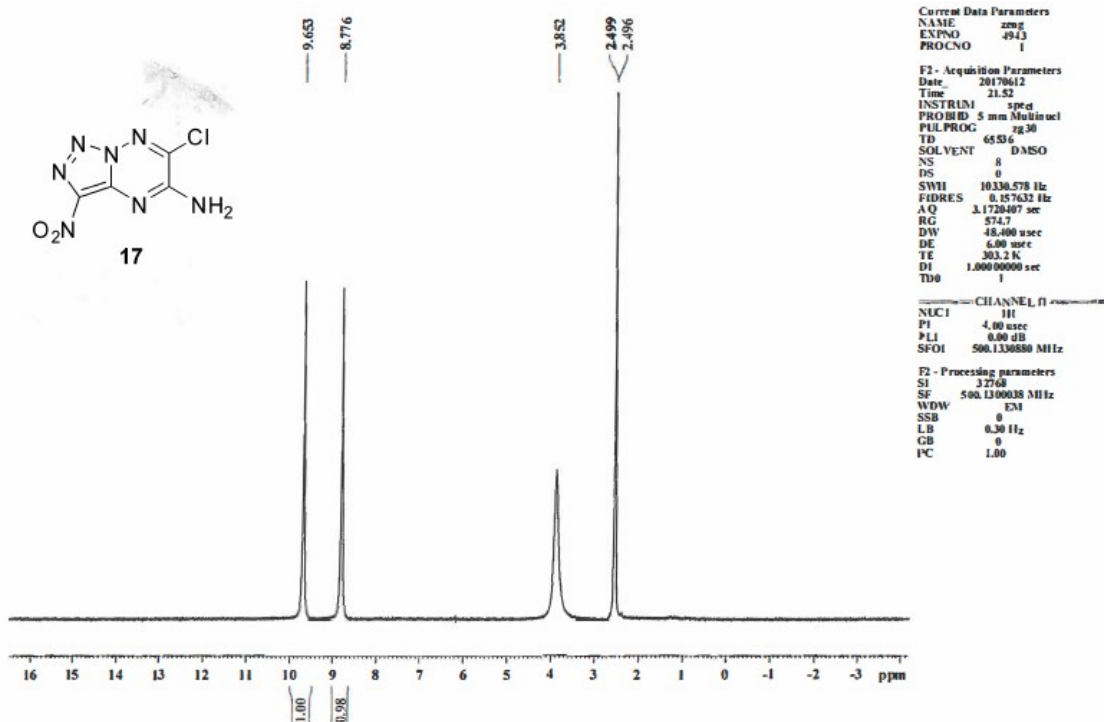

<sup>1</sup>H NMR of compound 17

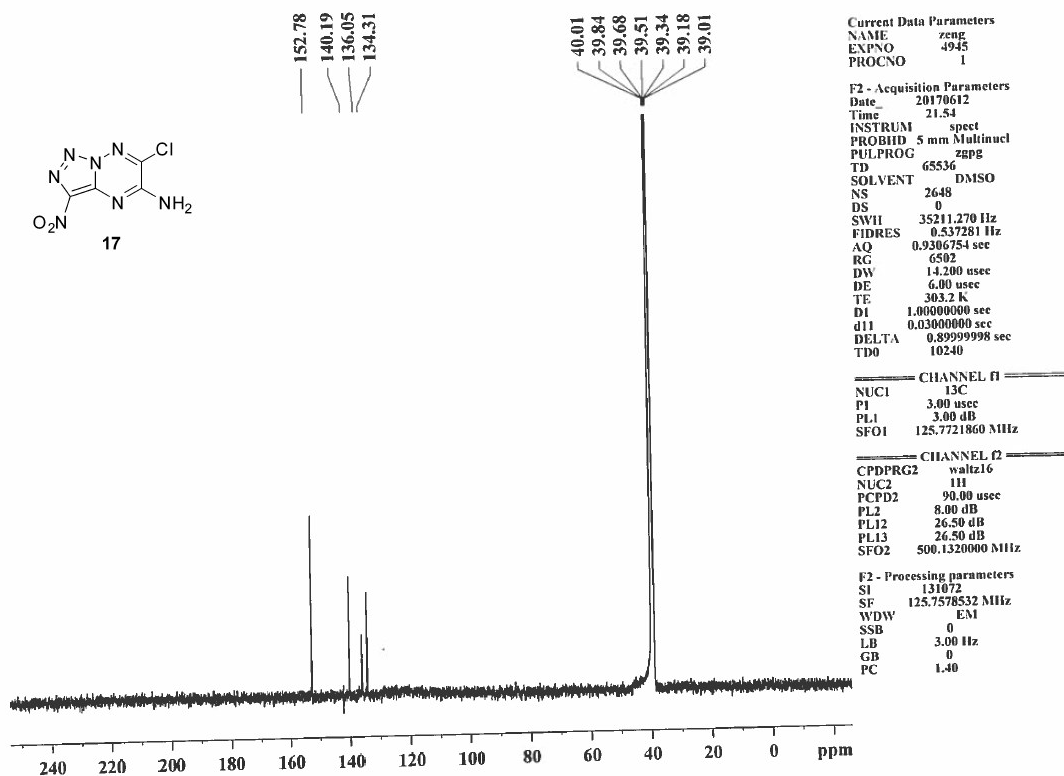

<sup>13</sup>C NMR of compound 17

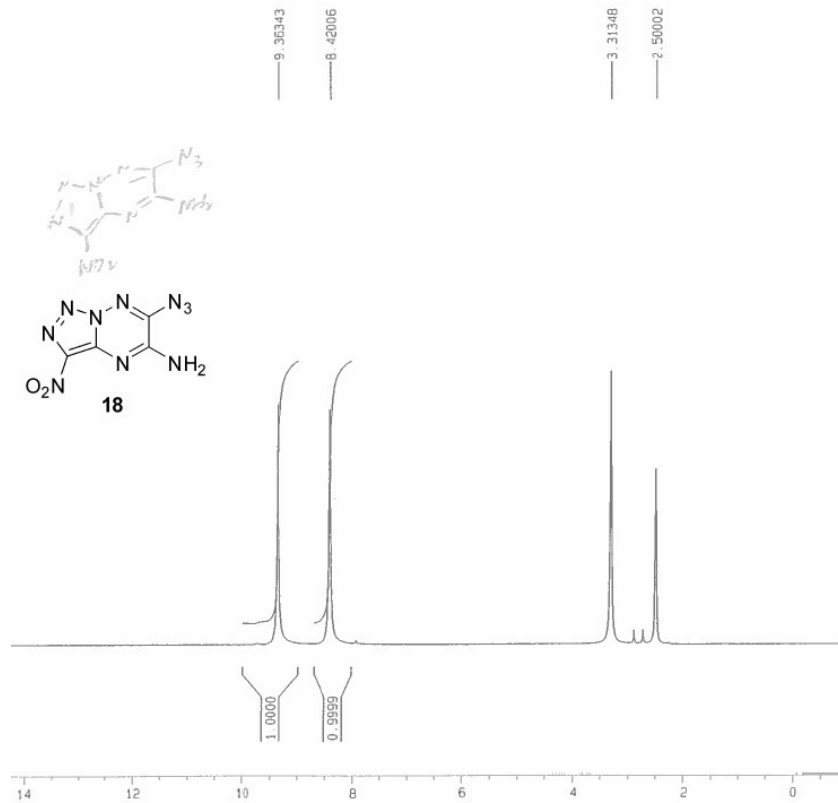

Current Date Parameters  
NAME pingqinH  
EXPNO 1572  
PROCNO 1

F2 - Acquisition Parameters  
Date\_ 20170925  
Time 15.59  
INSTRUM spect  
PROBHD 5 mm QNP 1H/13  
PULPROG zg  
TD 32768  
SOLVENT DMSO  
NS 8  
DS 0  
SWH 4789.272 Hz  
FIDRES 0.146157 Hz  
AQ 3.4210291 sec  
RG 512  
DH 104.400 usec  
DE 6.00 usec  
TE 300.0 K  
D1 1.00000000 sec

----- CHANNEL f1 -----  
NUC1 1H  
P1 3.00 usec  
PL1 -4.00 dB  
SFO1 300.1321025 MHz

F2 - Processing parameters  
SI 32768  
SF 300.1300030 MHz  
WDW EH  
SSB 0  
LB 3.00 Hz  
GB 0  
PC 1.00

1D NMR plot parameters  
CX 20.00 cm  
CY 6.27 cm  
F1P 14.976 ppm  
F1 4494.87 Hz  
F2P -0.981 ppm  
F2 -294.41 Hz  
PRNCH 0.75787 ppm/cm  
HZCH 239.46351 Hz/cm

<sup>1</sup>H NMR of compound 18

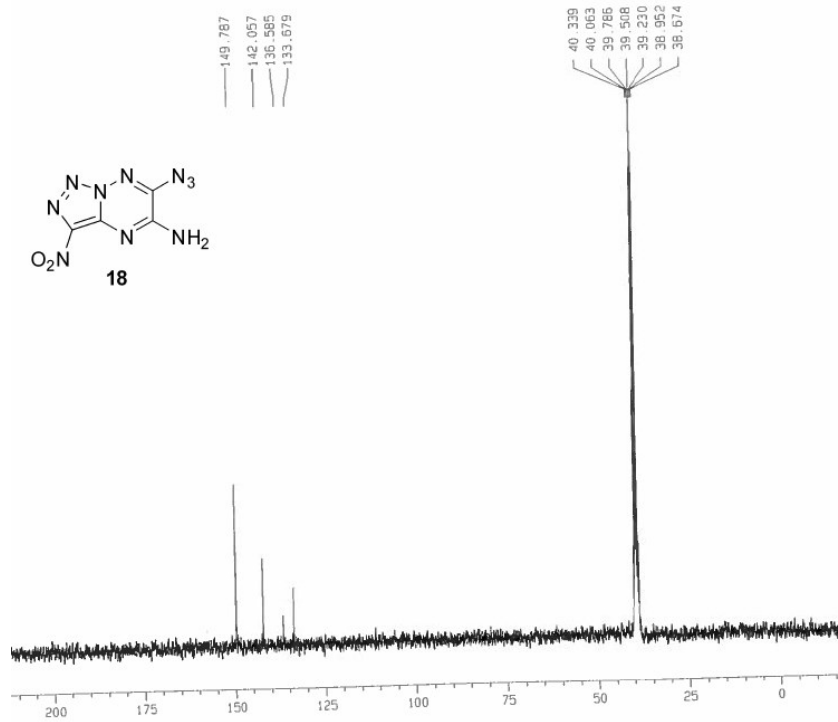

Current Date Parameters  
NAME pingqinC  
EXPNO 405  
PROCNO 1

F2 - Acquisition Parameters  
Date\_ 20170925  
Time 16.01  
INSTRUM spect  
PROBHD 5 mm QNP 1H/13  
PULPROG zgpg  
TD 32768  
SOLVENT CD3CN  
NS 382  
DS 0  
SWH 17985.611 Hz  
FIDRES 0.548877 Hz  
AQ 0.9110004 sec  
RG 10390.4  
DH 27.800 usec  
DE 6.00 usec  
TE 300.0 K  
D1 1.00000000 sec  
S11 0.03000000 sec  
d12 0.0002000 sec

----- CHANNEL f1 -----  
NUC1 13C  
P1 4.00 usec  
PL1 -5.00 dB  
SFO1 75.4752953 MHz

----- CHANNEL f2 -----  
CPRPRG2 waltz16  
NUC2 1H  
PCPD2 190.00 usec  
PL2 120.00 dB  
PL12 17.00 dB  
PL13 17.00 dB  
SFO2 300.1312005 MHz

F2 - Processing parameters  
SI 32768  
SF 75.4677881 MHz  
WDW EH  
SSB 0  
LB 3.00 Hz  
GB 6  
PC 1.40

1D NMR plot parameters  
CX 20.00 cm  
CY 12.83 cm  
F1P 219.702 ppm  
F1 16504.97 Hz  
F2P -19.520 ppm  
F2 -1480.64 Hz  
PRNCH 11.91609 ppm/cm  
HZCH 899.26864 Hz/cm

<sup>13</sup>C NMR of compound 18

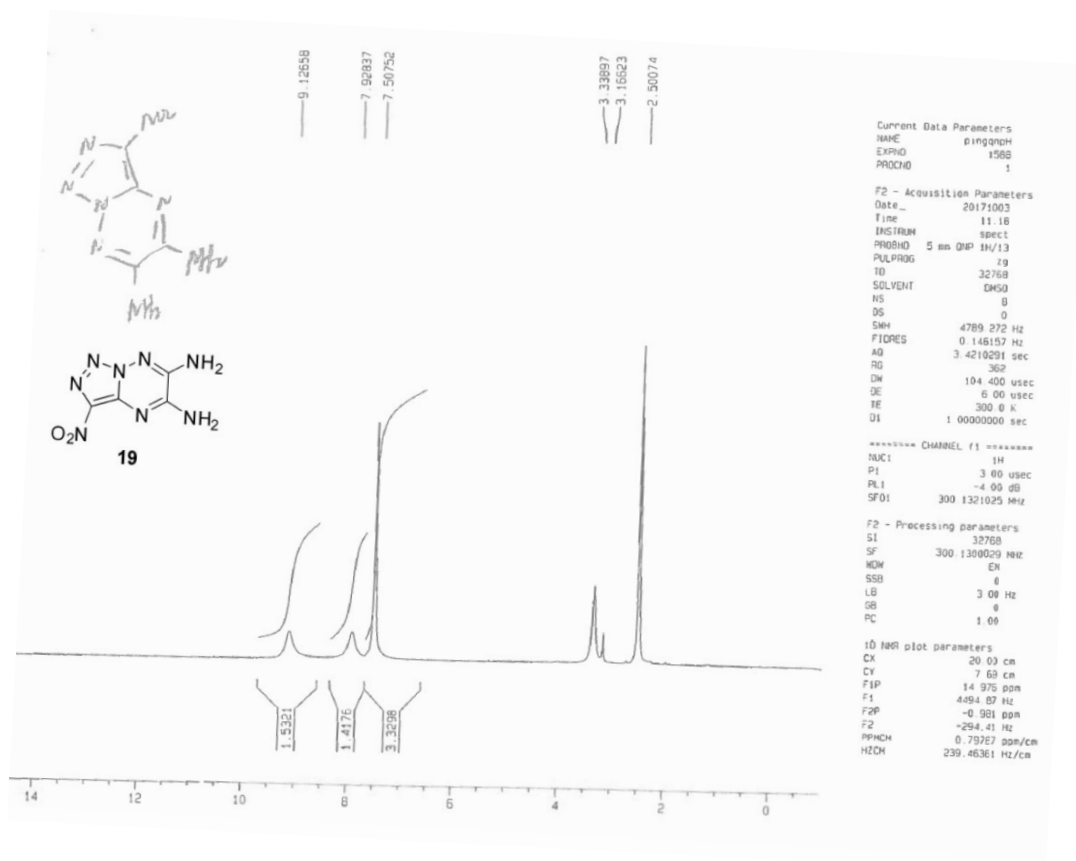

<sup>1</sup>H NMR of compound 19

<sup>13</sup>C NMR of compound 19
