# Supplementary figures and images for: Tunable Dimroth rearrangement of versatile 1,2,3-triazoles towards high-performance energetic materials
Source: Royal Society of Chemistry journal article supplement (doi:10.1039/d1ta00109d), 2021-01-01

RT: 0.00 - 1.00

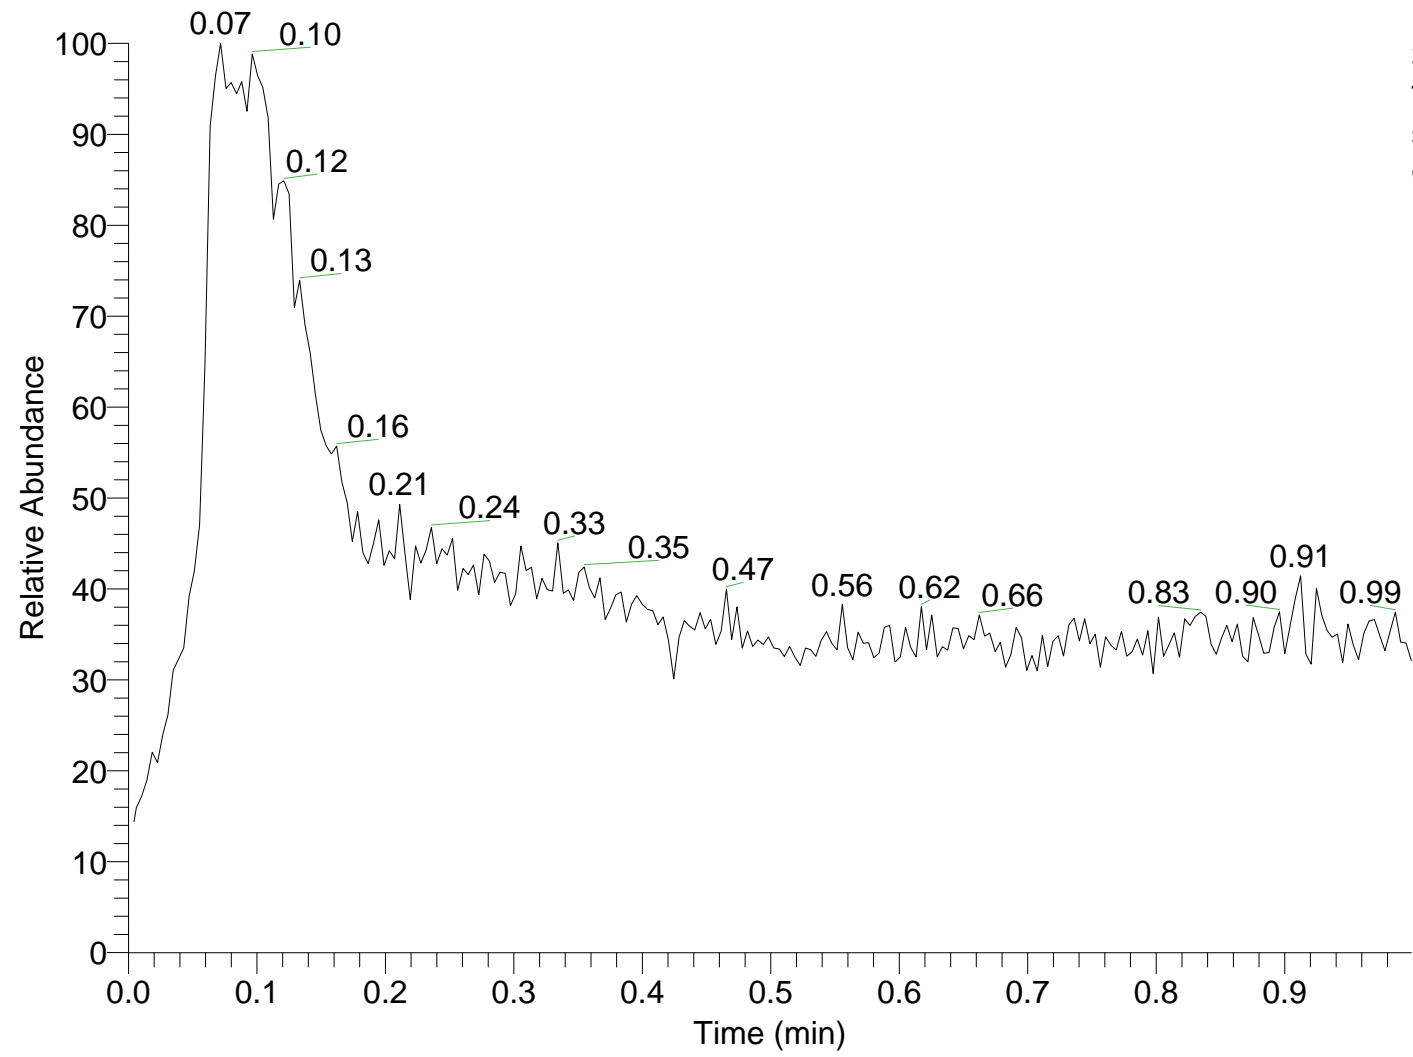

NL:  
3.27E7  
TIC MS  
shihongliang  
g-12

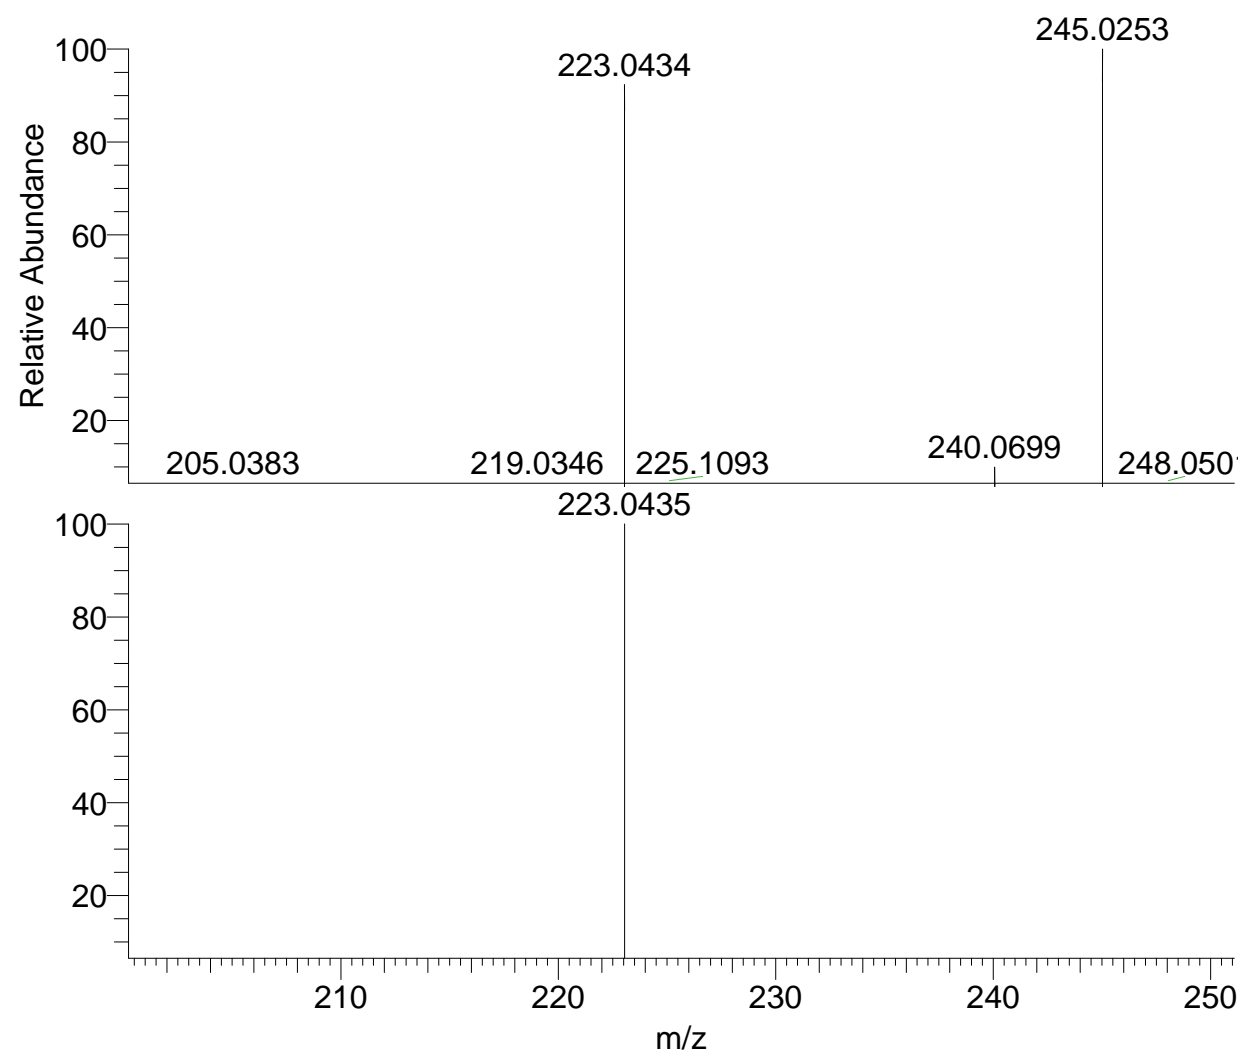

NL:  
3.76E6  
shihongliang-12#22  
RT: 0.09 AV: 1 T:  
FTMS + p ESI Full  
ms  
[120.00-2000.00]

NL:  
9.18E5  
 $C_4H_2N_{10}O_2 + H$ :  
 $C_4H_3N_{10}O_2$   
pa Chrg 1

Supplement: d1ta00109d2.pdf [file d1ta00109d2.pdf]

RT: 0.00 - 1.00

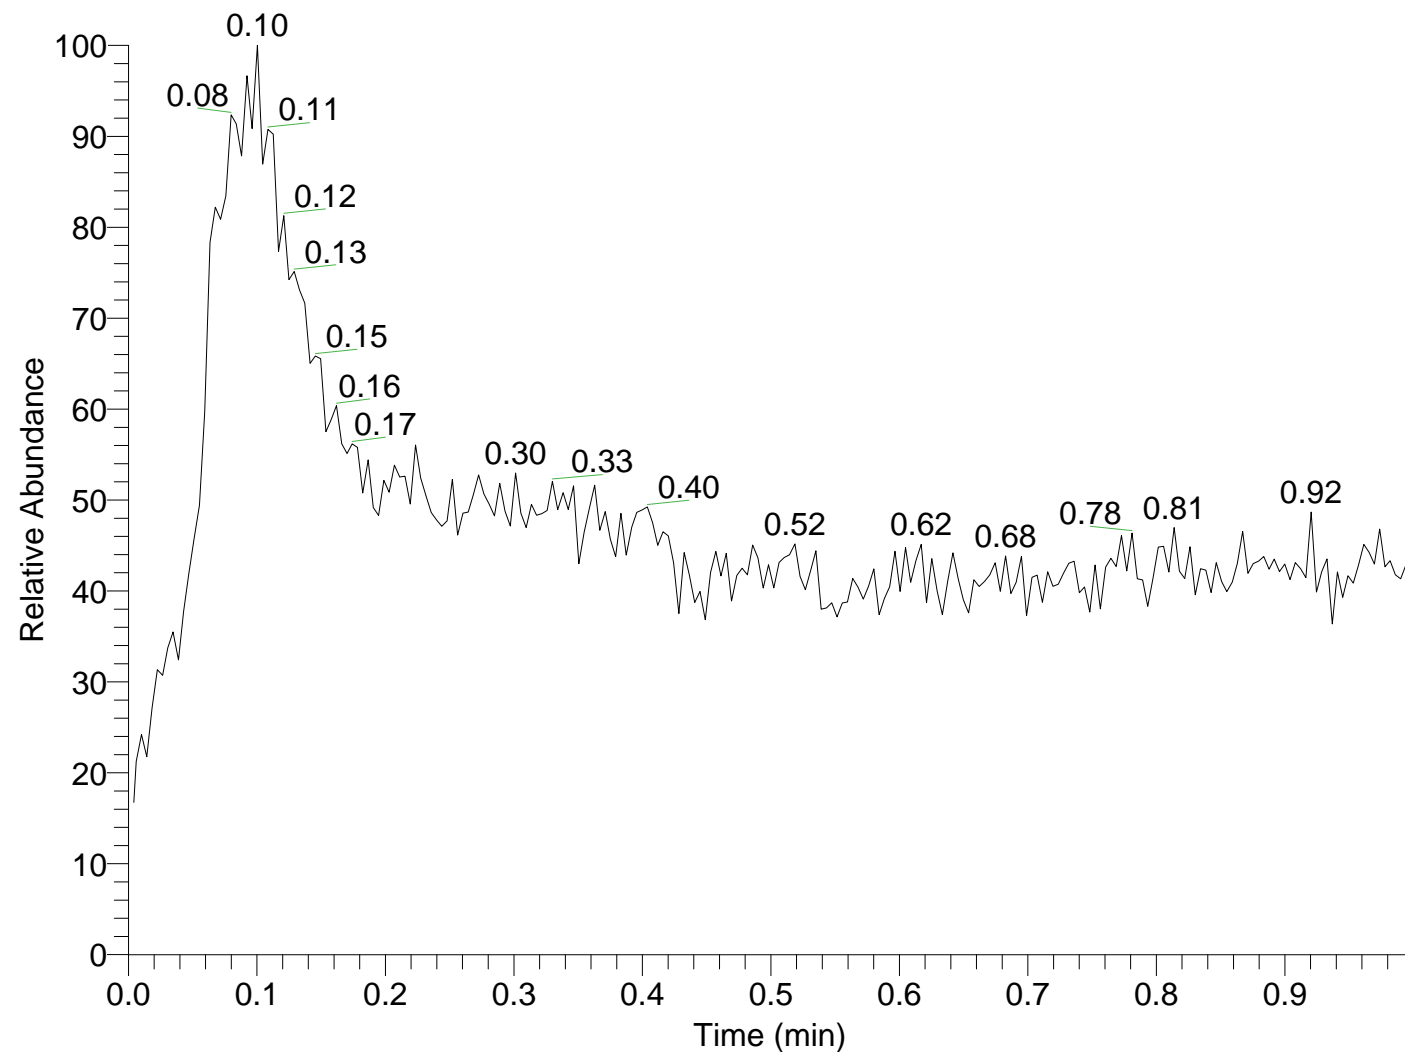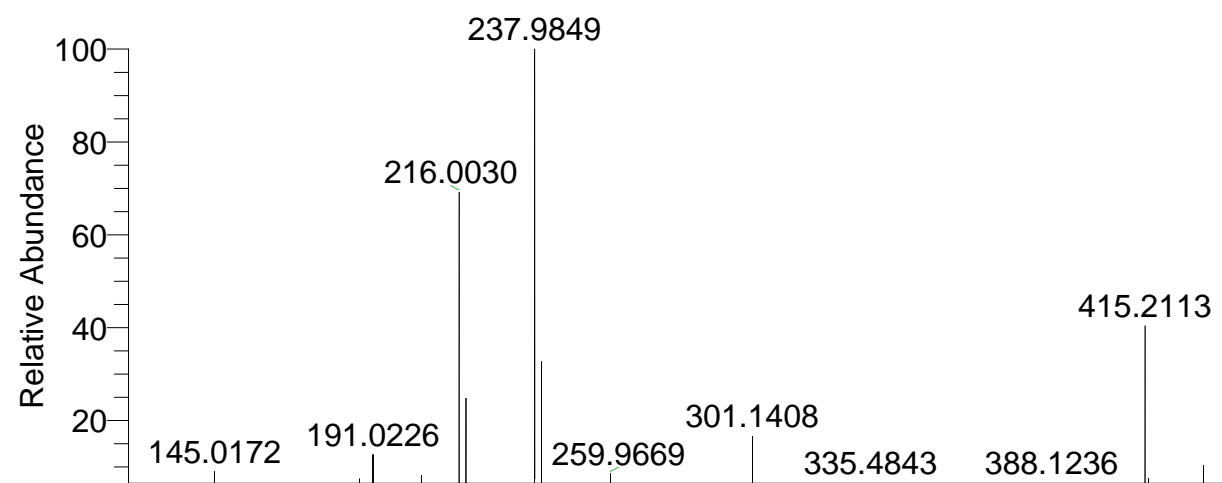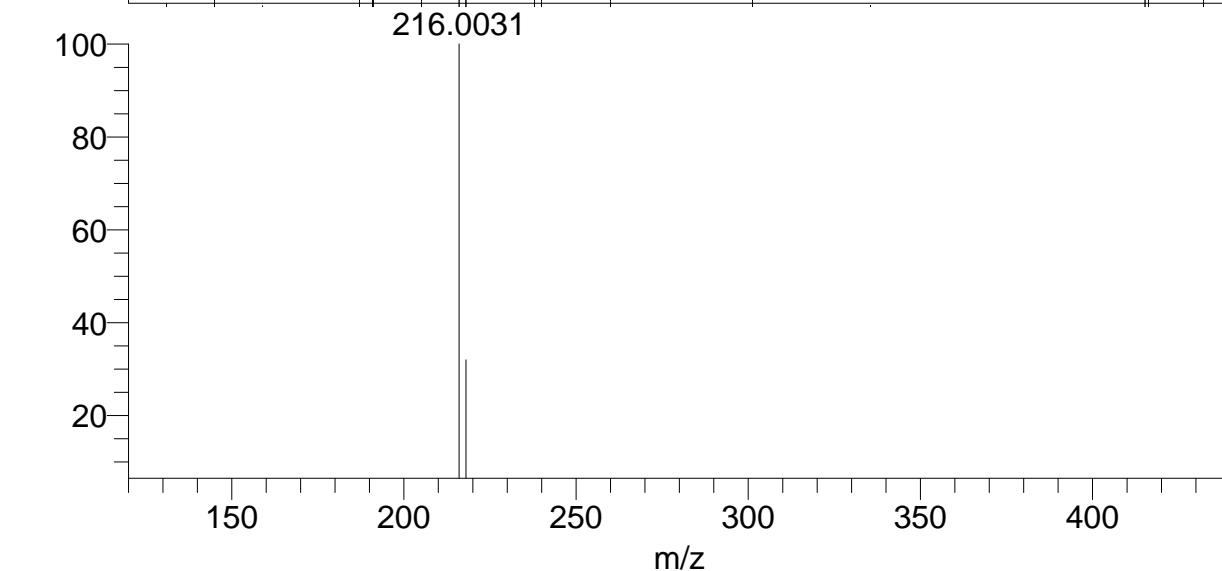

Supplement: d1ta00109d3.pdf [file d1ta00109d3.pdf]
